# Supplementary material
Source: MDPI journal article supplement (https://www.mdpi.com/2075-163X/12/4/471)
Supplement: s1 [file s1]

# Characterization of Bentonites from the *in situ* ABM5 Heater Experiment at Äspö Hard Rock Laboratory, Sweden

Ana María Fernández<sup>1,\*</sup>, José F. Marco<sup>2</sup>, Paula Nieto<sup>1</sup>, Fco. Javier León<sup>1</sup>, Luz María Robredo<sup>1</sup>, M. Angeles Clavero<sup>1</sup>, Ana Cardona<sup>1</sup>, Sergio Fernández<sup>1</sup>, Daniel Svensson<sup>3</sup> and Patrik Sellin<sup>3</sup>

<sup>1</sup> CIEMAT, Departamento de Energía, Madrid, Spain; [anamaria.fernandez@ciemat.es](mailto:anamaria.fernandez@ciemat.es)

<sup>2</sup> CSIC, Instituto de Química Física “Rocasolano”, Madrid, Spain; [jfmarco@iqfr.csic.es](mailto:jfmarco@iqfr.csic.es)

<sup>3</sup> Department of Research and Safety Assessment, SKB—Svensk Kärnbränslehantering, Stockholm, Sweden; [daniel.svensson@skb.se](mailto:daniel.svensson@skb.se) (D.S.); [patrik.sellin@skb.se](mailto:patrik.sellin@skb.se) (P.S.)

\* Correspondence: [anamaria.fernandez@ciemat.es](mailto:anamaria.fernandez@ciemat.es)

**Table S1.** Mineral phases observed in the bentonite samples by means of XRD, FTIR and SEM techniques.

| Type of mineral phases | Mineral phases                       | Original Samples            | Granite contact                    | Medium part                                    | Heater contact                                 |
|------------------------|--------------------------------------|-----------------------------|------------------------------------|------------------------------------------------|------------------------------------------------|
| Fe-oxyhydroxides       | Goethite (weak FM) (Gth)             | Asha 505<br>Rokle           | Asha B28<br>Rokle B14              | Asha B28<br>Febex B25<br>Rokle B14<br>MX-80 B1 | Asha B28<br>Febex B25<br>Rokle B14<br>MX-80 B1 |
|                        | Hematite (AFM) (Hem)                 | Asha 505<br>MX-80           | Asha B28<br>MX-80 B1               | Asha B28<br>MX-80 B1                           | Asha B28<br>Rokle B14<br>MX-80 B1              |
|                        | Magnetite (FM) (Mag)                 | NO                          | NO                                 | NO                                             | NO                                             |
|                        | Titanomagnetite (Tmag)               | NO                          | NO                                 | NO                                             | NO                                             |
|                        | Maghemite (FM) (Mgh)                 | NO                          | NO                                 | NO                                             | NO                                             |
|                        | Ferrihydrite (Fhy)                   | NO                          | NO                                 | NO                                             | NO                                             |
| Carbonates             | Calcite (Cal)                        | All                         | All                                | All                                            | All                                            |
|                        | Monohydrocalcite (MhCal)             | NO                          | NO                                 | NO                                             | MX-80 B1                                       |
|                        | Dolomite (Dol)                       | Rokle                       | Rokle B14                          | Rokle B14                                      | Rokle B14                                      |
|                        | Magnesite (Mgs)                      | NO                          | NO                                 | NO                                             | NO                                             |
|                        | Siderite (Sd)                        | Rokle<br>MX-80              | Rokle B14<br>MX-80 B1              | Febex B25<br>Rokle B14<br>MX-80 B1             | Febex B25<br>Rokle B14<br>MX-80 B1             |
| Sulfides               | Pyrrhotite (Pyh)                     | NO                          | NO                                 | NO                                             | NO                                             |
|                        | Mackinawite (Mkw)                    | NO                          | NO                                 | NO                                             | NO                                             |
|                        | Pyrite (Py)                          | MX-80                       | MX-80 B1                           | Asha B28<br>Rokle B14<br>MX-80 B1              | Asha B28<br>Rokle B14<br>MX-80 B1              |
|                        | Sphalerite (Sp)                      | NO                          | NO                                 | NO                                             | MX-80 B1                                       |
| Sulfates               | Gypsum (Gp)                          | MX-80                       | MX-80 B1                           | Asha B28<br>MX-80 B1                           | Asha B28<br>MX-80 B1                           |
|                        | Barite (Ba)                          | ?                           | ?                                  | ?                                              | Febex B25<br>Rokle B14                         |
| Silica oxides          | Quartz (Qz)                          | All                         | All                                | All                                            | All                                            |
|                        | Cristobalite (Crs)                   | All                         | All                                | All                                            | All                                            |
|                        | Tridymite (Trd)                      | ?                           | ?                                  | ?                                              | Rokle B14                                      |
| Feldspars              | K-feldspars (KFs)                    | All                         | All                                | All                                            | All                                            |
|                        | Plagioclases (Pl)                    | All                         | All                                | All                                            | All                                            |
| Titanium oxides        | Anatase (Ant)                        | Rokle                       | Rokle B14                          | Asha B28<br>Rokle B14                          | Rokle B14                                      |
| Mg-hydroxides          | Brucite (Brc)                        | No                          | No                                 | No                                             | No                                             |
| Zeolites               | Clinoptilolite (Cpt)                 | No                          | No                                 | Asha B28                                       | Asha B28                                       |
| Smectites              | Montmorillonite (Mnt)                | All                         | All                                | All                                            | All                                            |
|                        | Saponite (Sap)                       | No                          | No                                 | No                                             | No                                             |
| Illite/Muscovite       | Illite (Ilt)/Muscovite (Ms)          | Febex B25<br>Rokle<br>MX-80 | Febex B25<br>Rokle B14<br>MX-80 B1 | Febex B25<br>Rokle B14<br>MX-80 B1             | Febex B25<br>Rokle B14<br>MX-80 B1             |
| Kaolinites             | Kaolinite (Kln)                      | Asha 505<br>Rokle           | Asha B28<br>Rokle B14              | Asha B28<br>Rokle B14                          | Asha B28<br>Rokle B14                          |
| Chlorites              | Clinochlore(Clc)/<br>Chamosite (Chm) | No                          | No                                 | No                                             | No                                             |

**Table S2.** Positions and assignments of vibrational bands of dioctahedral smectites, kaolinite and illite

| Wavenumber (cm <sup>-1</sup> )             | Assignment [1,2,3,4]                                                                                                                                                                                                                                                                                                         |
|--------------------------------------------|------------------------------------------------------------------------------------------------------------------------------------------------------------------------------------------------------------------------------------------------------------------------------------------------------------------------------|
| 3800-3500                                  | OH stretching of inner structural hydroxyl groups (influenced by nature of the coordinated octahedral cations):<br><ul style="list-style-type: none"> <li>- AlAlOH (dioctahedral): 3623 cm<sup>-1</sup></li> <li>- Mg<sub>3</sub>OH (trioctahedral): 3680 cm<sup>-1</sup></li> <li>- FeFeOH: 3567 cm<sup>-1</sup></li> </ul> |
| 3426                                       | OH stretching of adsorbed water                                                                                                                                                                                                                                                                                              |
| 3240                                       | OH stretching of adsorbed water                                                                                                                                                                                                                                                                                              |
| 3150-3170                                  | Fe-oxyhydroxide                                                                                                                                                                                                                                                                                                              |
| 1634                                       | OH bending of adsorbed water                                                                                                                                                                                                                                                                                                 |
| 1430<br>(872, 712)                         | $\nu_3$ -CO <sub>3</sub> asymmetric stretching of calcite<br>( $\nu_2$ : out of plane bending, $\nu_4$ : planar bending): calcite                                                                                                                                                                                            |
| 1115                                       | Si-O stretching vibration (out-of-plane)                                                                                                                                                                                                                                                                                     |
| 1030-1020                                  | Si-O stretching vibration (in-plane):<br><ul style="list-style-type: none"> <li>- Dioctahedral: 1030 cm<sup>-1</sup></li> <li>- Trioctahedral: 1020 cm<sup>-1</sup></li> </ul>                                                                                                                                               |
| 917                                        | Kaolinite inner OH deformation                                                                                                                                                                                                                                                                                               |
| 915                                        | AlAlOH bending                                                                                                                                                                                                                                                                                                               |
| 885                                        | AlFeOH bending                                                                                                                                                                                                                                                                                                               |
| 850                                        | AlMgOH bending                                                                                                                                                                                                                                                                                                               |
| 820                                        | FeFeOH bending (nontronite: 817, 676 cm <sup>-1</sup> )                                                                                                                                                                                                                                                                      |
| 795                                        | MgMgOH bending                                                                                                                                                                                                                                                                                                               |
| 765                                        | FeMgOH bending                                                                                                                                                                                                                                                                                                               |
| 792                                        | Kaolinite Si-O-Al vibrations                                                                                                                                                                                                                                                                                                 |
| 792<br>790/800<br>798 & 780 doublet<br>794 | Si-O stretching of silica<br>Amorphous silica (opal, volcanic glass, etc.)<br>Quartz<br>Cristobalite                                                                                                                                                                                                                         |
| 754                                        | Kaolinite Si-O-Al vibrations                                                                                                                                                                                                                                                                                                 |
| 750                                        | Illite Al-O-Si vibration                                                                                                                                                                                                                                                                                                     |
| 700                                        | Illite OH bending                                                                                                                                                                                                                                                                                                            |
| 698                                        | Kaolinite OH translation                                                                                                                                                                                                                                                                                                     |
| 655-660                                    | Mg <sub>3</sub> OH bending (saponite)                                                                                                                                                                                                                                                                                        |
| 644                                        | Kaolinite inner surface OH vibration                                                                                                                                                                                                                                                                                         |
| 626<br>792, 624<br>790                     | Coupled Al-O and Si-O (out-of-plane),<br>Si-O of cristobalite<br>Si-O of tridymite                                                                                                                                                                                                                                           |
| 624                                        | R-O-Si with R=Al, Mg, Fe                                                                                                                                                                                                                                                                                                     |
| 539                                        | Kaolinite Si-O-Al (out of plane) bending (Al in tetrahedral sheet)                                                                                                                                                                                                                                                           |
| 520                                        | Si-O-Al bending (Al tetrahedral cation)                                                                                                                                                                                                                                                                                      |
| 465                                        | Si-O-Si bending vibration                                                                                                                                                                                                                                                                                                    |
| 426                                        | Si-O bending vibration                                                                                                                                                                                                                                                                                                       |
| 825, 750                                   | Illite                                                                                                                                                                                                                                                                                                                       |
| 740, 790, 890, 1150                        | Fe oxyhydroxide                                                                                                                                                                                                                                                                                                              |
| Complex bands 400-900                      | Feldspars                                                                                                                                                                                                                                                                                                                    |

**Table S3.** Chemical composition of the solid phase (total fraction) for different samples obtained after dismantling of ABM5 experiment: Asha Block 28, Febex Block 25 and Rokle Block 11.

| Samples<br>/ wt. %             | Asha Block 28       |        |        |        | FEBEX Block 25 |        |        |        | Rokle Block 11 |        |        |        |
|--------------------------------|---------------------|--------|--------|--------|----------------|--------|--------|--------|----------------|--------|--------|--------|
|                                | Ref. <sup>[5]</sup> | G      | H      | M      | Ref.           | G      | M      | H      | Ref.           | G      | M      | H      |
| Distance to Heater (cm)        | 10                  | 8.3    | 5.0    | 1.7    | 10             | 8.3    | 5.0    | 1.7    | 10             | 8.3    | 5.0    | 1.7    |
| SiO <sub>2</sub>               | 46.48               | 45.53  | 44.56  | 45.51  | 55.46          | 61.48  | 61.04  | 60.57  | 48.06          | 43.62  | 44.02  | 42.98  |
| Al <sub>2</sub> O <sub>3</sub> | 20.64               | 19.44  | 18.94  | 19.34  | 17.28          | 18.02  | 17.98  | 18.09  | 14.52          | 14.15  | 14.16  | 14.14  |
| Fe <sub>2</sub> O <sub>3</sub> | 12.16               | 23.34  | 24.05  | 21.87  | 3.09           | 6.64   | 6.60   | 8.16   | 15.94          | 24.04  | 23.75  | 24.62  |
| MgO                            | 2.01                | 2.60   | 2.60   | 2.60   | 4.37           | 4.10   | 4.20   | 4.10   | 2.12           | 2.50   | 2.40   | 2.50   |
| CaO                            | 0.84                | 3.23   | 3.55   | 3.87   | 1.75           | 4.02   | 3.89   | 3.32   | 2.85           | 3.45   | 3.45   | 3.31   |
| Na <sub>2</sub> O              | 1.97                | 1.60   | 1.60   | 1.60   | 1.16           | 1.40   | 1.90   | 1.30   | 0.26           | 1.30   | 1.50   | 1.60   |
| K <sub>2</sub> O               | 0.14                | 0.39   | 0.38   | 0.43   | 0.99           | 1.77   | 1.79   | 1.76   | 1.00           | 1.50   | 1.47   | 1.48   |
| SrO                            | 0.02                | 0.04   | 0.04   | 0.03   | 0.02           | 0.05   | 0.06   | 0.07   | 0.04           | 0.08   | 0.08   | 0.08   |
| TiO <sub>2</sub>               | 1.01                | 1.74   | 1.51   | 1.68   | 0.15           | 0.23   | 0.30   | 0.31   | 4.51           | 6.61   | 6.50   | 6.58   |
| P <sub>2</sub> O <sub>5</sub>  | 0.09                | < d.l. | 0.16   | 0.16   | 0.03           | < d.l. | 0.10   | 0.11   | 0.84           | 0.71   | 0.67   | 0.65   |
| MnO                            | 0.05                | 0.08   | 0.06   | 0.07   | 0.03           | 0.04   | 0.04   | 0.03   | 0.19           | 0.09   | 0.09   | 0.08   |
| ZnO                            | 0.02                | 0.05   | 0.04   | 0.05   | 0.01           | 0.02   | 0.02   | 0.02   | 0.02           | 0.03   | 0.03   | 0.03   |
| Cr <sub>2</sub> O <sub>3</sub> | 0.04                | 0.13   | 0.11   | 0.13   | < d.l.         | 0.02   | 0.02   | < d.l. | 0.03           | 0.00   | 0.08   | 0.09   |
| CuO                            | 0.02                | 0.04   | 0.03   | 0.03   | < d.l.         | < d.l. | < d.l. | < d.l. | 0.03           | 0.04   | 0.04   | 0.04   |
| NiO                            | 0.01                | 0.02   | 0.02   | 0.03   | < d.l.         | 0.01   | < d.l. | < d.l. | 0.01           | 0.01   | < d.l. | < d.l. |
| ZrO <sub>2</sub>               | 0.01                | 0.02   | 0.02   | 0.01   | 0.02           | 0.03   | 0.04   | 0.05   | 0.06           | 0.10   | 0.10   | 0.11   |
| SnO <sub>2</sub>               | < d.l.              | 0.01   | 0.01   | 0.01   | < d.l.         | < d.l. | < d.l. | < d.l. | < d.l.         | < d.l. | < d.l. | 0.01   |
| CdO                            | < d.l.              | < d.l. | 0.01   | 0.01   | < d.l.         | < d.l. | < d.l. | < d.l. | < d.l.         | < d.l. | < d.l. | < d.l. |
| V <sub>2</sub> O <sub>5</sub>  | 0.07                | 0.04   | < d.l. | < d.l. | 0.01           | < d.l. | < d.l. | 0.01   | < d.l.         | < d.l. | < d.l. | < d.l. |
| PbO                            | < d.l.              | < d.l. | < d.l. | < d.l. | < d.l.         | 0.02   | 0.02   | 0.02   | < d.l.         | < d.l. | < d.l. | < d.l. |
| SO <sub>3</sub>                | 0.15                | 0.58   | 1.12   | 1.42   | < d.l.         | 0.59   | 0.59   | 0.64   | 0.05           | 0.57   | 0.55   | 0.61   |
| Cl                             | 0.30                | 1.16   | 1.19   | 1.10   | 0.024          | 1.58   | 1.45   | 1.40   | 0.002          | 1.19   | 1.08   | 1.02   |

**Table S4.** Chemical composition of the solid phase (total fraction) for different samples obtained after dismantling of ABM5 experiment: IBECO Block 11, MX-80 Block 1.

| Samples<br>/ wt. %             | IBECO Block 11 |       |        |        | MX-80 Block 1 |        |       |
|--------------------------------|----------------|-------|--------|--------|---------------|--------|-------|
|                                | Ref.           | G     | 3      | 2      | Ref.          | G      | M     |
| Distance to Heater (cm)        | 10             | 8.75  | 6.25   | 3.75   | 10            | 8.3    | 5.0   |
| SiO <sub>2</sub>               | 50.32          | 60.34 | 60.36  | 60.90  | 62.89         | 60.64  | 60.15 |
| Al <sub>2</sub> O <sub>3</sub> | 15.7           | 17.71 | 18.63  | 18.41  | 19.87         | 20.03  | 20.01 |
| Fe <sub>2</sub> O <sub>3</sub> | 4.76           | 6.52  | 6.71   | 6.94   | 3.53          | 7.60   | 7.50  |
| MgO                            | 4.76           | 5.30  | 4.60   | 4.40   | 2.40          | 2.70   | 2.70  |
| CaO                            | 5.29           | 3.47  | 3.52   | 3.69   | 1.24          | 4.22   | 4.23  |
| Na <sub>2</sub> O              | 0.89           | 2.40  | 2.10   | 1.60   | 2.09          | 1.60   | 1.70  |
| K <sub>2</sub> O               | 0.55           | 1.23  | 1.29   | 1.24   | 0.52          | 0.91   | 0.87  |
| SrO                            | 0.02           | 0.05  | 0.06   | 0.06   | 0.03          | 0.08   | 0.08  |
| TiO <sub>2</sub>               | 0.63           | 0.60  | 0.61   | 0.55   | 0.07          | < d.l. | 0.21  |
| P <sub>2</sub> O <sub>5</sub>  | 0.11           | 0.07  | < d.l. | 0.14   | 0.03          | < d.l. | 0.15  |
| MnO                            | 0.12           | 0.08  | 0.06   | 0.06   | 0.01          | 0.05   | 0.03  |
| ZnO                            | 0.01           | 0.03  | 0.03   | 0.02   | 0.01          | 0.02   | 0.02  |
| ZrO <sub>2</sub>               | 0.02           | 0.03  | 0.04   | 0.04   | 0.03          | 0.04   | 0.04  |
| PbO                            | 0.00           | 0.01  | < d.l. | < d.l. | 0.00          | 0.02   | 0.02  |
| SO <sub>3</sub>                | 0.19           | 0.63  | 0.59   | 0.66   | 0.19          | 1.18   | 1.40  |
| Cl                             | 0.009          | 1.41  | 1.34   | 1.29   | 0.003         | 0.85   | 0.81  |

**Table S5.** Fe(II), Fe(III) and total Fe contents obtained after dismantling of ABM5 experiment.

| Samples     | Distance to heater (cm) | Fe(II) wt. % | Total Fe wt. % | Fe(III) wt. % | Fe(II)/Fe(III) | Fe(II) in Total Fe wt. % |
|-------------|-------------------------|--------------|----------------|---------------|----------------|--------------------------|
| MX-80 Ref.  | --                      | 0.27         | 2.40           | 2.13          | 0.13           | 11.25                    |
| MX-80 B1 G  | 8.3                     | 0.62         | 2.88           | 2.26          | 0.27           | 21.54                    |
| MX-80 B1 M  | 5.0                     | 0.63         | 2.85           | 2.22          | 0.28           | 22.14                    |
| MX-80 B1 H  | 1.7                     | 0.66         | 5.11           | 4.44          | 0.15           | 12.99                    |
| IBECO Ref.  | --                      | 0.19         | 3.10           | 2.91          | 0.07           | 6.13                     |
| IBECO B11 G | 8.75                    | 0.29         | 2.15           | 1.86          | 0.16           | 13.65                    |
| IBECO B11 3 | 6.25                    | 0.30         | 2.19           | 1.89          | 0.16           | 13.57                    |
| IBECO B11 2 | 3.75                    | 0.35         | 2.22           | 1.87          | 0.19           | 15.86                    |
| IBECO B11 H | 1.25                    | 0.60         | 3.36           | 2.76          | 0.22           | 17.81                    |
| Rokle Ref.1 | --                      | 0.37         | 6.97           | 6.60          | 0.06           | 5.28                     |
| Rokle B14 G | 8.3                     | 0.26         | 8.98           | 8.72          | 0.03           | 2.94                     |
| Rokle B14 M | 5.0                     | 0.30         | 8.96           | 8.66          | 0.03           | 3.31                     |
| Rokle B14 H | 1.7                     | 0.36         | 9.59           | 9.22          | 0.04           | 3.81                     |
| Febex Ref.  | --                      | 0.15         | 2.30           | 2.15          | 0.07           | 6.52                     |
| FEBEX 25 G  | 8.3                     | 0.14         | 1.86           | 1.72          | 0.08           | 7.54                     |
| FEBEX B25 M | 5.0                     | 0.16         | 1.90           | 1.74          | 0.09           | 8.37                     |
| FEBEX B25 H | 1.7                     | 0.30         | 2.21           | 1.91          | 0.16           | 13.51                    |
| Asha B28 G  | 8.3                     | 0.19         | 5.74           | 5.55          | 0.03           | 3.32                     |
| Asha B28 M  | 5.0                     | 0.21         | 6.66           | 6.45          | 0.03           | 3.18                     |
| Asha B28 H  | 1.7                     | 0.27         | 5.60           | 5.34          | 0.05           | 4.74                     |

**Table S6.** Parameters deduced from the BET and *t*-plot treatment on the adsorption of N<sub>2</sub> at 77 K from samples obtained after dismantling of ABM5 experiment.

| Sample      | Distance to heater (cm) | C <sub>BET</sub> | V <sub>m</sub> <sup>1</sup> (cm <sup>3</sup> /g) | S <sub>BET</sub> (m <sup>2</sup> /g) | S <sub>tot</sub> <sup>2</sup> (m <sup>2</sup> /g) | V <sub>tot</sub> <sup>3</sup> (cm <sup>3</sup> /g) | S <sub>micro</sub> <sup>4</sup> (m <sup>2</sup> /g) | V <sub>micr</sub> <sup>5</sup> (cm <sup>3</sup> /g) | S <sub>ext micro</sub> <sup>6</sup> (m <sup>2</sup> /g) | S <sub>ext meso</sub> <sup>7</sup> (m <sup>2</sup> /g) | V <sub>meso</sub> <sup>8</sup> (cm <sup>3</sup> /g) |
|-------------|-------------------------|------------------|--------------------------------------------------|--------------------------------------|---------------------------------------------------|----------------------------------------------------|-----------------------------------------------------|-----------------------------------------------------|---------------------------------------------------------|--------------------------------------------------------|-----------------------------------------------------|
| Asha B28 G  | 8.30                    | 209.4            | 2.31·10 <sup>-2</sup> (l)                        | 65.41                                | 66.19                                             | 1.06·10 <sup>-1</sup>                              | 13.54                                               | 5.28·10 <sup>-3</sup>                               | 52.66                                                   | 41.31                                                  | 1.15·10 <sup>-2</sup> (l)                           |
| Asha B28 M  | 5.00                    | 176.0            | 1.98·10 <sup>-2</sup> (l)                        | 55.99                                | 56.18                                             | 1.02·10 <sup>-1</sup>                              | 8.29                                                | 3.29·10 <sup>-3</sup>                               | 47.88                                                   | 39.10                                                  | 7.99·10 <sup>-3</sup> (l)                           |
| Asha B28 H  | 1.70                    | 243.8            | 2.18·10 <sup>-2</sup> (l)                        | 61.49                                | 61.58                                             | 1.08·10 <sup>-1</sup>                              | 13.09                                               | 5.50·10 <sup>-3</sup>                               | 48.49                                                   | 41.53                                                  | 9.39·10 <sup>-3</sup> (l)                           |
| Febex B25 G | 8.30                    | 258.3            | 1.35·10 <sup>-2</sup> (l)                        | 38.01                                | 37.53                                             | 7.80·10 <sup>-2</sup>                              | 8.47                                                | 3.78·10 <sup>-3</sup>                               | 29.06                                                   | 22.98                                                  | 7.03·10 <sup>-3</sup> (l)                           |
| Febex B25 M | 5.00                    | 471.3            | 1.62·10 <sup>-2</sup> (l)                        | 45.76                                | 46.62                                             | 8.90·10 <sup>-2</sup>                              | 13.69                                               | 5.59·10 <sup>-3</sup>                               | 32.93                                                   | 26.02                                                  | 9.28·10 <sup>-3</sup> (l)                           |
| Febex B25 H | 1.70                    | 239.4            | 1.28·10 <sup>-2</sup> (l)                        | 36.20                                | 36.21                                             | 8.41·10 <sup>-2</sup>                              | 7.76                                                | 3.27·10 <sup>-3</sup>                               | 28.44                                                   | 25.36                                                  | 4.99·10 <sup>-3</sup> (l)                           |
| Rokle B14 G | 8.30                    | 341.8            | 2.37·10 <sup>-2</sup> (l)                        | 66.90                                | 67.32                                             | 1.19·10 <sup>-1</sup>                              | 17.53                                               | 7.38·10 <sup>-3</sup>                               | 49.78                                                   | 38.76                                                  | 1.33·10 <sup>-2</sup> (l)                           |
| Rokle B14 M | 5.00                    | 349.8            | 2.27·10 <sup>-2</sup> (l)                        | 64.09                                | 64.77                                             | 1.15·10 <sup>-1</sup>                              | 17.57                                               | 7.27·10 <sup>-3</sup>                               | 47.20                                                   | 38.80                                                  | 1.18·10 <sup>-2</sup> (l)                           |
| Rokle B14 H | 1.70                    | 287.8            | 2.08·10 <sup>-2</sup> (l)                        | 58.70                                | 59.39                                             | 1.16·10 <sup>-1</sup>                              | 14.42                                               | 5.88·10 <sup>-3</sup>                               | 44.94                                                   | 41.01                                                  | 7.94·10 <sup>-3</sup> (l)                           |
| IBECO B11 G | 8.75                    | 319.8            | 1.76·10 <sup>-2</sup> (l)                        | 49.75                                | 51.19                                             | 9.77·10 <sup>-2</sup>                              | 13.90                                               | 5.35·10 <sup>-3</sup>                               | 37.29                                                   | 26.29                                                  | 1.14·10 <sup>-2</sup> (l)                           |
| IBECO B11 3 | 6.25                    | 403.4            | 1.73·10 <sup>-2</sup> (l)                        | 48.98                                | 50.76                                             | 9.58·10 <sup>-2</sup>                              | 16.28                                               | 6.25·10 <sup>-3</sup>                               | 34.49                                                   | 25.75                                                  | 1.11·10 <sup>-2</sup> (l)                           |
| IBECO B11 2 | 3.75                    | 284.7            | 1.59·10 <sup>-2</sup> (l)                        | 45.04                                | 46.21                                             | 9.06·10 <sup>-2</sup>                              | 11.80                                               | 4.54·10 <sup>-3</sup>                               | 34.42                                                   | 25.68                                                  | 9.42·10 <sup>-3</sup> (l)                           |
| IBECO B11 H | 1.25                    | 400.8            | 1.83·10 <sup>-2</sup> (l)                        | 51.71                                | 53.88                                             | 1.00·10 <sup>-1</sup>                              | 16.52                                               | 6.23·10 <sup>-3</sup>                               | 37.36                                                   | 27.55                                                  | 1.15·10 <sup>-2</sup> (l)                           |
| MX 80 B1 G  | 8.30                    | 436.5            | 7.96·10 <sup>-3</sup> (l)                        | 22.48                                | 23.45                                             | 6.32·10 <sup>-2</sup>                              | 6.94                                                | 2.60·10 <sup>-3</sup>                               | 16.52                                                   | 14.45                                                  | 3.73·10 <sup>-3</sup>                               |
| MX 80 B1 M  | 5.00                    | 188.7            | 6.69·10 <sup>-3</sup> (l)                        | 18.91                                | 19.19                                             | 6.04·10 <sup>-3</sup>                              | 3.17                                                | 1.19·10 <sup>-3</sup>                               | 16.02                                                   | 14.91                                                  | 1.78·10 <sup>-3</sup>                               |
| MX 80 B1 H  | 1.70                    | 256.9            | 7.69·10 <sup>-3</sup> (l)                        | 21.72                                | 22.33                                             | 6.82·10 <sup>-2</sup>                              | 4.74                                                | 1.77·10 <sup>-3</sup>                               | 17.60                                                   | 16.05                                                  | 2.61·10 <sup>-3</sup>                               |

<sup>1</sup>V<sub>m</sub>: monolayer capacity derived from the BET treatment; expressed as (l): liquid; S<sub>BET</sub>: BET Surface area<sup>2</sup>S<sub>tot</sub>: Total surface area derived from the slope of the straight line passing through the origin of the *t*-plot<sup>3</sup>V<sub>tot</sub>: Total pore volume, derived from the amount of nitrogen adsorbed at p/p<sub>0</sub> of 0.98<sup>4</sup>S<sub>micro</sub>: S<sub>BET</sub> - S<sub>ext micro</sub>; Surface area of the micropores<sup>5</sup>V<sub>micr</sub>: Liquid microporous volume derived from the ordinate at the origin in the second straight line of the *t*-plot<sup>6</sup>S<sub>ext micro</sub>: Surface area derived from the slope of the second straight line of the *t*-plot<sup>7</sup>S<sub>ext meso</sub>: Surface area derived from the slope of the third straight line of the *t*-plot<sup>8</sup>V<sub>meso</sub>: Liquid microporous volume derived from the ordinate at the origin in the third straight line of the *t*-plot

**Table S7.** Total cation exchange capacity (CEC) and cation exchange population prior and after dismantling of the ABM5 experiment (in meq/100g).

| Sample        | Distance to heater (cm) | Na    | K    | Mg    | Ca    | Sr   | Ba    | Σ CEC | CEC  |
|---------------|-------------------------|-------|------|-------|-------|------|-------|-------|------|
| Asha 505 Ref. | --                      | 62.0  | 0.4  | 12.3  | 19.0  | --   | --    | 93.7  | 88.6 |
| Asha B28 G    | 8.3                     | 15.28 | 1.76 | 7.69  | 33.07 | 0.18 | 0.002 | 58.0  | 85.8 |
| Asha B28 M    | 5.0                     | 17.19 | 1.53 | 6.19  | 42.68 | 0.23 | 0.002 | 67.8  | 83.9 |
| Asha B28 H    | 1.7                     | 26.40 | 2.18 | 7.09  | 48.21 | 0.26 | 0.012 | 84.1  | 81.3 |
| FEBEX Ref.    | --                      | 27.97 | 5.46 | 34.17 | 32.72 | 0.37 | 0.008 | 100.7 | 98.1 |
| Febex B25 G   | 8.3                     | 18.12 | 2.65 | 11.80 | 41.81 | 0.31 | 0.013 | 74.7  | 97.6 |
| Febex B25 M   | 5.0                     | 22.28 | 2.86 | 14.51 | 45.81 | 0.46 | 0.010 | 85.9  | 96.5 |
| Febex B25 H   | 1.7                     | 22.73 | 2.62 | 15.55 | 41.83 | 0.41 | 0.009 | 83.2  | 93.1 |
| Rokle Ref.    | --                      | 0.61  | 4.72 | 19.08 | 52.48 | 0.14 | 0.010 | 77.1  | 73.8 |
| Rokle B14 G   | 8.3                     | 21.82 | 3.01 | 13.15 | 32.89 | 0.15 | 0.012 | 71.0  | 73.1 |
| Rokle B14 M   | 5.0                     | 23.06 | 3.02 | 11.42 | 30.94 | 0.14 | 0.012 | 68.6  | 73.0 |
| Rokle B14 H   | 1.7                     | 22.01 | 3.01 | 12.10 | 29.78 | 0.15 | 0.014 | 67.1  | 70.3 |
| IBECO Ref.    | --                      | 25.19 | 4.31 | 31.37 | 34.67 | 0.20 | 0.019 | 95.8  | 90.2 |
| IBECO B11 G   | 8.75                    | 36.63 | 3.44 | 9.68  | 46.40 | 0.24 | 0.022 | 96.4  | 97.1 |
| IBECO B11 3   | 6.25                    | 37.64 | 3.15 | 9.31  | 46.32 | 0.24 | 0.019 | 96.7  | 97.9 |
| IBECO B11 2   | 3.75                    | 37.43 | 3.97 | 9.97  | 44.17 | 0.26 | 0.073 | 95.9  | 88.6 |
| IBECO B11 H   | 1.25                    | 34.38 | 3.16 | 8.95  | 43.94 | 0.23 | 0.017 | 90.7  | 95.0 |
| MX-80 Ref.    | --                      | 58.49 | 4.18 | 6.86  | 15.63 | 0.44 | 0.009 | 85.6  | 83.6 |
| MX-80 B1 G    | 8.3                     | 23.95 | 1.31 | 8.78  | 48.42 | 0.53 | 0.008 | 83.0  | 84.1 |
| MX-80 B1 M    | 5.0                     | 23.45 | 1.32 | 8.80  | 47.15 | 0.53 | 0.006 | 81.2  | 87.6 |
| MX-80 B1 H    | 1.7                     | 24.52 | 1.40 | 12.65 | 46.31 | 0.55 | 0.007 | 85.4  | 87.8 |

**Table S8.** Soluble salts from aqueous leaching tests a 1:4 solid to liquid ration, in mg/L.

|                               | Asha B28 G | Asha B28 M | Asha B28 H | Febex B25 G | Febex B25 M | Febex B25 H | Rokle B14 G | Rokle B14 M | Rokle B14 H | Ibeco B11 G | Ibeco B11 3 | Ibeco B11 2 | Ibeco B11 H | MX 80 B1 G | MX 80 B1 M | MX 80 B1 H |
|-------------------------------|------------|------------|------------|-------------|-------------|-------------|-------------|-------------|-------------|-------------|-------------|-------------|-------------|------------|------------|------------|
| Distance to heater (cm)       | 8.30       | 5.00       | 1.70       | 8.30        | 5.00        | 1.70        | 8.30        | 5.00        | 1.70        | 8.75        | 6.25        | 3.75        | 1.25        | 8.30       | 5.00       | 1.70       |
| w.c. (%)                      | 16.8       | 17.6       | 13.4       | 13.8        | 13.3        | 13.2        | 8.6         | 8.9         | 8.1         | 13.6        | 13.1        | 13.6        | 13.6        | 11.6       | 11.6       | 11.4       |
| Tot. mass (g)                 | 5.02       | 5.00       | 5.01       | 5.00        | 5.00        | 5.01        | 5.00        | 5.00        | 5.01        | 5.04        | 5.00        | 2.50        | 5.01        | 5.00       | 5.01       | 5.00       |
| Tot. water (g)                | 20.72      | 20.75      | 20.59      | 20.61       | 20.59       | 20.58       | 20.40       | 20.41       | 20.38       | 20.60       | 20.58       | 10.30       | 20.60       | 20.52      | 20.52      | 20.51      |
| pH                            | 7.8        | 7.6        | 7.8        | 7.7         | 7.8         | 7.7         | 7.8         | 8           | 7.9         | 7.8         | 7.8         | 7.7         | 7.9         | 7.7        | 7.5        | 7.6        |
| Alk (meq/L)                   | 1.23       | 0.77       | 1.5        | 0.86        | 1.18        | 0.87        | 1.38        | 1.74        | 1.76        | 1.10        | 1.22        | 1.40        | 1.25        | 1.17       | 1.06       | 1.03       |
| F <sup>-</sup>                | 1.1        | 0.52       | 0.15       | 1.1         | 1.2         | 1.3         | 1.6         | 1.7         | 1.7         | 1.1         | 0.94        | 1.1         | 0.8         | 1.2        | 0.86       | 0.98       |
| Br <sup>-</sup>               | 3.1        | 2.9        | 3          | 4.6         | 3.9         | 3.7         | 4.2         | 3.3         | 3           | 4.2         | 3.8         | 4.1         | 3.4         | 1.1        | 0.91       | 0.83       |
| Cl <sup>-</sup>               | 517        | 490        | 521        | 800         | 680         | 645         | 675         | 543         | 495         | 761         | 668         | 670         | 602         | 206        | 176        | 168        |
| NO <sub>3</sub> <sup>-</sup>  | <1.0       | <1.0       | <1.0       | <1.0        | <1.0        | <1.0        | <1          | <1          | <1          | <1          | <1          | <1          | <1          | <1         | <1         | <1         |
| SO <sub>4</sub> <sup>2-</sup> | 155        | 937        | 742        | 147         | 182         | 114         | 151         | 144         | 128         | 103         | 95          | 99          | 100         | 635        | 930        | 939        |
| Si                            | 10         | 13         | 12         | 19          | 17          | 19          | 10          | 13          | 19          | 9.8         | 9.8         | 4.4         | 13          | 1.2        | 14         | 9.3        |
| Na                            | 420        | 650        | 630        | 570         | 510         | 470         | 520         | 450         | 420         | 550         | 500         | 500         | 470         | 440        | 500        | 500        |
| K                             | 5.1        | 9.3        | 9.3        | 11          | 11          | 11          | 18          | 17          | 16          | 14          | 13          | 14          | 13          | 12         | 14         | 15         |
| Ca                            | 13         | 78         | 61         | 23          | 18          | 13          | 15          | 11          | 8.8         | 13          | 10          | 11          | 9           | 29         | 54         | 53         |
| Mg                            | 1.4        | 6.5        | 8          | 4.5         | 4           | 3.5         | 4.2         | 3.2         | 2.6         | 1.8         | 1.4         | 1.5         | 1.2         | 3.3        | 5.9        | 5.9        |
| Sr                            | 0.13       | 0.67       | 0.56       | 0.32        | 0.34        | 0.25        | 0.17        | 0.14        | 0.11        | 0.16        | 0.13        | 0.14        | 0.11        | 0.71       | 1.4        | 1.5        |
| Ba                            | <0.03      | <0.03      | <0.03      | <0.03       | <0.03       | <0.03       | 0.07        | 0.06        | 0.05        | 0.05        | 0.04        | 0.04        | 0.03        | 0.04       | 0.05       | 0.06       |
| B                             | 0.66       | 1.1        | 1.4        | 0.53        | 0.8         | 0.31        | 0.09        | 0.05        | <0.03       | 0.19        | <0.22       | <0.3        | <0.16       | <0.3       | <0.3       | <0.3       |
| Fe                            | <0.03      | <0.03      | <0.03      | <0.03       | <0.03       | <0.03       | <0.03       | <0.03       | <0.03       | <0.03       | <0.03       | <0.3        | <0.03       | <0.3       | <0.3       | <0.3       |
| Mn                            | <0.03      | <0.03      | <0.03      | <0.03       | <0.03       | <0.03       | <0.03       | 0.04        | 0.04        | <0.03       | <0.03       | <0.3        | <0.03       | <0.3       | <0.3       | <0.3       |
| Al                            | <0.03      | <0.03      | <0.03      | <0.03       | <0.03       | <0.03       | 0.03        | <0.03       | 0.05        | <0.03       | <0.03       | <0.3        | <0.03       | <0.3       | <0.3       | <0.3       |
| Ti                            | <0.03      | <0.03      | <0.03      | <0.03       | <0.03       | <0.03       | <0.03       | <0.03       | <0.03       | <0.03       | <0.03       | <0.3        | <0.03       | <0.3       | <0.3       | <0.3       |
| Zn                            | <0.03      | <0.03      | <0.03      | <0.03       | <0.03       | <0.03       | <0.03       | <0.03       | <0.03       | <0.03       | <0.03       | <0.03       | <0.03       | <0.3       | <0.3       | <0.3       |
| Acetate                       | <1         | <1         | <1         | <1          | <1          | <1          | <1          | <1          | <1          | <1          | <1          | <1          | <1          | <1         | <1         | 3.0        |
| Formate                       | <1         | <1         | <1         | <1          | <1          | <1          | <1          | <1          | <1          | <1          | <1          | <1          | <1          | <1         | <1         | <1         |

**Table S9.** Ion inventory obtained from aqueous leaching tests, in mol/100g.

| Sample      | Distance to heater (cm) | pH  | Cl <sup>-</sup> | F <sup>-</sup> | Br <sup>-</sup> | SO <sub>4</sub> <sup>2-</sup> | HCO <sub>3</sub> <sup>-</sup> |
|-------------|-------------------------|-----|-----------------|----------------|-----------------|-------------------------------|-------------------------------|
| Asha B28 G  | 8.30                    | 7.8 | 7.0309          | 0.0279         | 0.0187          | 0.7780                        | 0.5928                        |
| Asha B28 M  | 5.00                    | 7.6 | 6.7447          | 0.0134         | 0.0177          | 4.7601                        | 0.3756                        |
| Asha B28 H  | 1.70                    | 7.8 | 6.8495          | 0.0037         | 0.0175          | 3.6003                        | 0.6989                        |
| Febex B25 G | 8.30                    | 7.7 | 10.5830         | 0.0272         | 0.0270          | 0.7177                        | 0.4032                        |
| Febex B25 M | 5.00                    | 7.8 | 8.9476          | 0.0295         | 0.0228          | 0.8839                        | 0.5503                        |
| Febex B25 H | 1.70                    | 7.7 | 8.4615          | 0.0318         | 0.0215          | 0.5520                        | 0.4045                        |
| Rokle B14 G | 8.30                    | 7.8 | 8.4344          | 0.0373         | 0.0233          | 0.6964                        | 0.6111                        |
| Rokle B14 M | 5.00                    | 8.0 | 6.8080          | 0.0398         | 0.0184          | 0.6663                        | 0.7732                        |
| Rokle B14 H | 1.70                    | 7.9 | 6.1383          | 0.0393         | 0.0165          | 0.5858                        | 0.7735                        |
| IBECO B11 G | 8.75                    | 7.8 | 9.9682          | 0.0269         | 0.0244          | 0.4979                        | 0.5112                        |
| IBECO B11 3 | 6.25                    | 7.8 | 8.7709          | 0.0230         | 0.0221          | 0.4604                        | 0.5660                        |
| IBECO B11 2 | 3.75                    | 7.9 | 7.9313          | 0.0197         | 0.0199          | 0.4863                        | 0.6532                        |
| IBECO B11 H | 1.25                    | 7.7 | 8.8444          | 0.0271         | 0.0240          | 0.4823                        | 0.5851                        |
| MX 80 B1 G  | 8.30                    | 7.7 | 2.6612          | 0.0289         | 0.0063          | 3.0276                        | 0.5372                        |
| MX 80 B1 M  | 5.00                    | 7.5 | 2.2692          | 0.0207         | 0.0052          | 4.4255                        | 0.4824                        |
| MX 80 B1 H  | 1.70                    | 7.6 | 2.1656          | 0.0236         | 0.0047          | 4.4672                        | 0.4706                        |

**Table S10.** Calculated parameters and saturation indexes of the pore waters.

| Sample                             | Asha Block 28 S | FEBEX Block 25 W | Rokle Block 14 NW | IBECO Block 11 S | MX-80 Block 1 IN |
|------------------------------------|-----------------|------------------|-------------------|------------------|------------------|
| Sq. Pressure (MPa)                 | 20              | 30               | 20                | 20               | 30               |
| a <sub>w</sub>                     | 0.997           | 0.979            | 0.978             | 0.982            | 0.994            |
| Specific Conductance (μS/cm, 25°C) | 63461           | 59715            | 60189             | 50531            | 18908            |
| I (M)                              | 0.91            | 0.85             | 0.82              | 0.69             | 0.26             |
| Water type                         | Na-Ca-Cl        | Na-Ca-Cl         | Na-Ca-Cl          | Na-Ca-Cl         | Na-Cl            |
| SI Anhydrite                       | 0.24            | 0.14             | 0.15              | 0.24             | -0.15            |
| SI Gypsum                          | 0.39            | 0.29             | 0.30              | 0.40             |                  |
| SI Celestine                       | -0.08           | 0.04             | -0.04             | 0.01             | -0.02            |
| SI Barite                          | 1.16            | 1.26             | 1.31              | --               | 1.84             |
| SI Calcite                         | 0.98            | 0.41             | 0.79              | 0.01             | -0.02            |
| SI Dolomite                        | 1.16            | 0.67             | 1.01              | -0.20            | -0.15            |
| SI Magnesite                       | 0.45            | 0.53             | 0.50              | 0.06             | 0.14             |
| SI Strontianite                    | -0.73           | -1.08            | -0.79             | -1.62            | -1.28            |
| SI CO <sub>2</sub> (g)             | -3.63           | -2.87            | -3.28             | -2.71            | -2.79            |
| SI Chalcedony                      | 1.35            | -0.12            | -0.41             | 1.33             | -0.06            |
| SI Quartz                          | 1.64            | 0.17             | -0.13             | 1.62             | 0.22             |
| Greenrust (OH)                     | --              | 6.79             | --                | --               | 3.23             |
| Lepidrocrocite                     | --              | 5.57             | --                | --               | 4.45             |
| Jarosite (K)                       | --              | 3.26             | --                | --               | 0.31             |
| Goethite                           | --              | 7.06             | --                | --               | 5.94             |
| Maghemite (dis)                    | --              | 12.01            | --                | --               | 9.76             |
| Magnetite                          | --              | 13.69            | --                | --               | 10.05            |
| Hematite                           | --              | 14.89            | --                | --               | 12.65            |
| Ferrihydrite                       | --              | 4.01             | --                | --               | 2.89             |
| SI Halite                          | -2.49           | -2.59            | -2.51             | -2.69            | -3.54            |

**Table S11.** Chemical composition of the pore waters obtained by squeezing at 25 MPa for water vapour saturated FEBEX, IBECO RW C16, and MX-80 bentonites at initial conditions.

| Bentonites                           | Febex<br>28.2% w.c. <sup>(*)</sup> | IBECO RW C16<br>28.9% w.c. <sup>(*)</sup> | MX80<br>25.6% w.c. <sup>(*)</sup> |
|--------------------------------------|------------------------------------|-------------------------------------------|-----------------------------------|
| Volume (mL)                          | 5                                  | 1.75                                      | 2                                 |
| pH                                   | 7.3                                | 7.8                                       | 8.0                               |
| E. C. (µS/cm)                        | 21695                              | 13785                                     | 22596                             |
| I (M)                                | 0.27                               | 0.19                                      | 0.33                              |
| Water type                           | Na-Mg-Cl                           | Na-SO <sub>4</sub> -Cl                    | Na-SO <sub>4</sub>                |
| Cl (mg/L)                            | 6600                               | 2800                                      | 1100                              |
| SO <sub>4</sub> <sup>2-</sup> (mg/L) | 2600                               | 4300                                      | 9300                              |
| Br (mg/L)                            | 12                                 | 5                                         | < 5                               |
| NO <sub>3</sub> <sup>-</sup> (mg/L)  | 143                                | 58                                        | 1200                              |
| Alkalinity (meq/L)                   | 2.06                               | 2.88                                      | n.d.                              |
| Si (mg/L)                            | 14                                 | 8.5                                       | < 0.8                             |
| Na (mg/L)                            | 3200                               | 2400                                      | 4900                              |
| K (mg/L)                             | 34                                 | 43                                        | 59                                |
| Ca (mg/L)                            | 649                                | 380                                       | 278                               |
| Mg (mg/L)                            | 591                                | 312                                       | 146                               |
| Sr (mg/L)                            | 11                                 | 4                                         | 6.8                               |
| Fe (mg/L)                            | ≤ 0.15                             | < 0.38                                    | < 0.8                             |
| Al (mg/L)                            | 0.27                               | < 0.38                                    | < 0.8                             |
| B (mg/L)                             | 1.2                                | 1.2                                       | < 0.8                             |
| Mn (mg/L)                            | 0.22                               | 0.96                                      | < 0.8                             |
| Ba (mg/L)                            | < 0.15                             | < 0.38                                    | < 0.8                             |
| pCO <sub>2</sub> (bar)               | -2.37                              | -2.70                                     | --                                |

<sup>(\*)</sup>Raw bentonites samples were submitted to a relative humidity of 100% inside a dessicator containing water during at least 3 months prior to squeezing test.

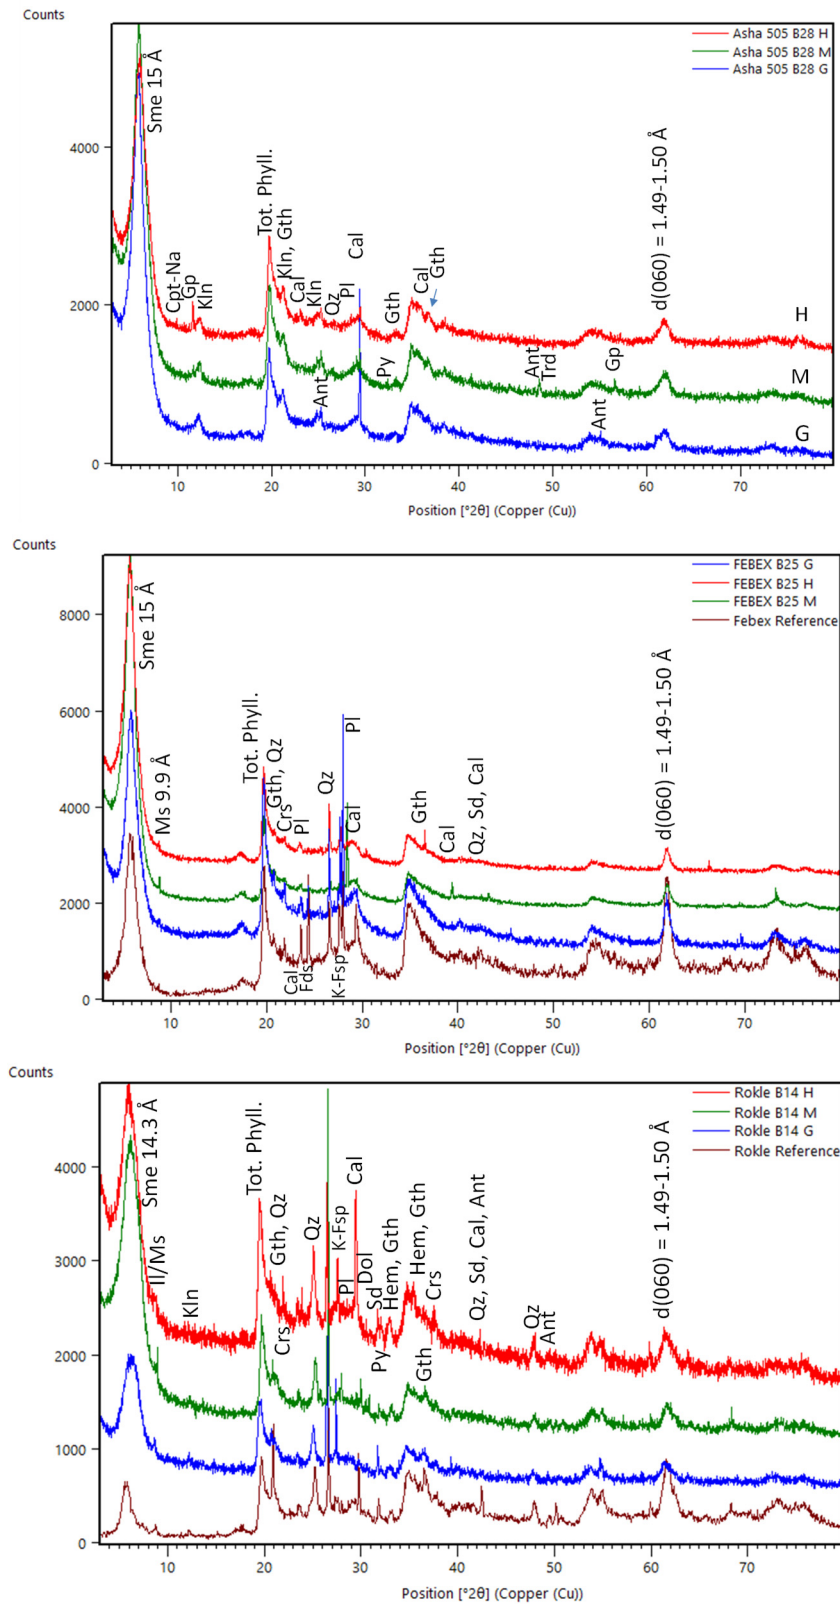

**Figure S1.** XRD patterns of total fraction samples from ABM5 experiment. Symbols according to [6]. Sme: smectite, Ill/Ms: illite/muscovite, Cpt-Na: Clinoptilolite, Gp: Gypsum, Tot. Phyll: total phyllosilicates, Crs: cristobalite, Cal: calcite, MhCla: monohydrocalcite, Qz: quartz, K-Fsp: potassium feldspar, Pl: Plagioclase, Dol: dolomite, Mgs: magnesite, Gth: goethite, Hem: hematite.



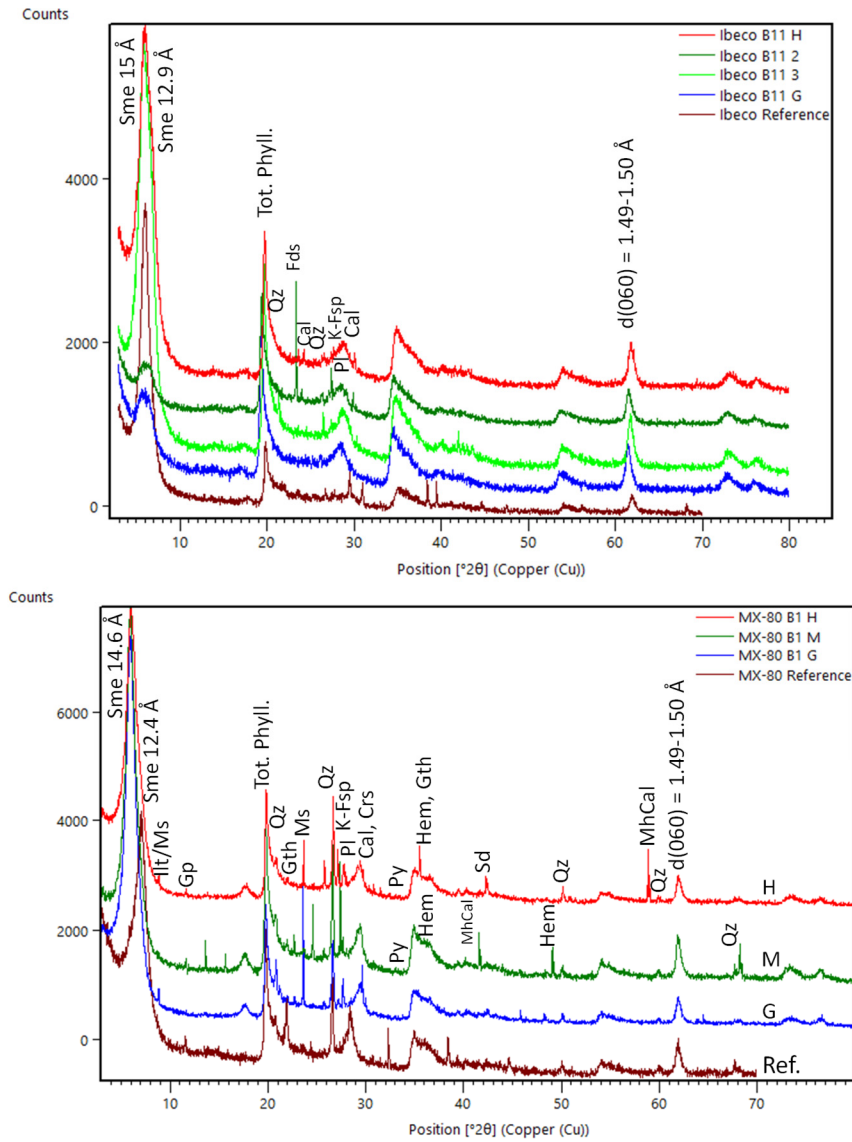

**Figure S1.** XRD patterns of total fraction samples from ABM5 experiment. Continuation. Symbols according to [6]. Sme: smectite, Ilt/Ms: illite/muscovite, Cpt-Na: Clinoptilolite, Gp: Gypsum, Tot. Phyll: total phyllosilicates, Crs: cristobalite, Cal: calcite, MhCla: monohydrocalcite, Qz: quartz, K-Fsp: potassium feldspar, Pl: Plagioclase, Dol: dolomite, Mgs: magnesite, Gth: goethite, Hem: hematite.

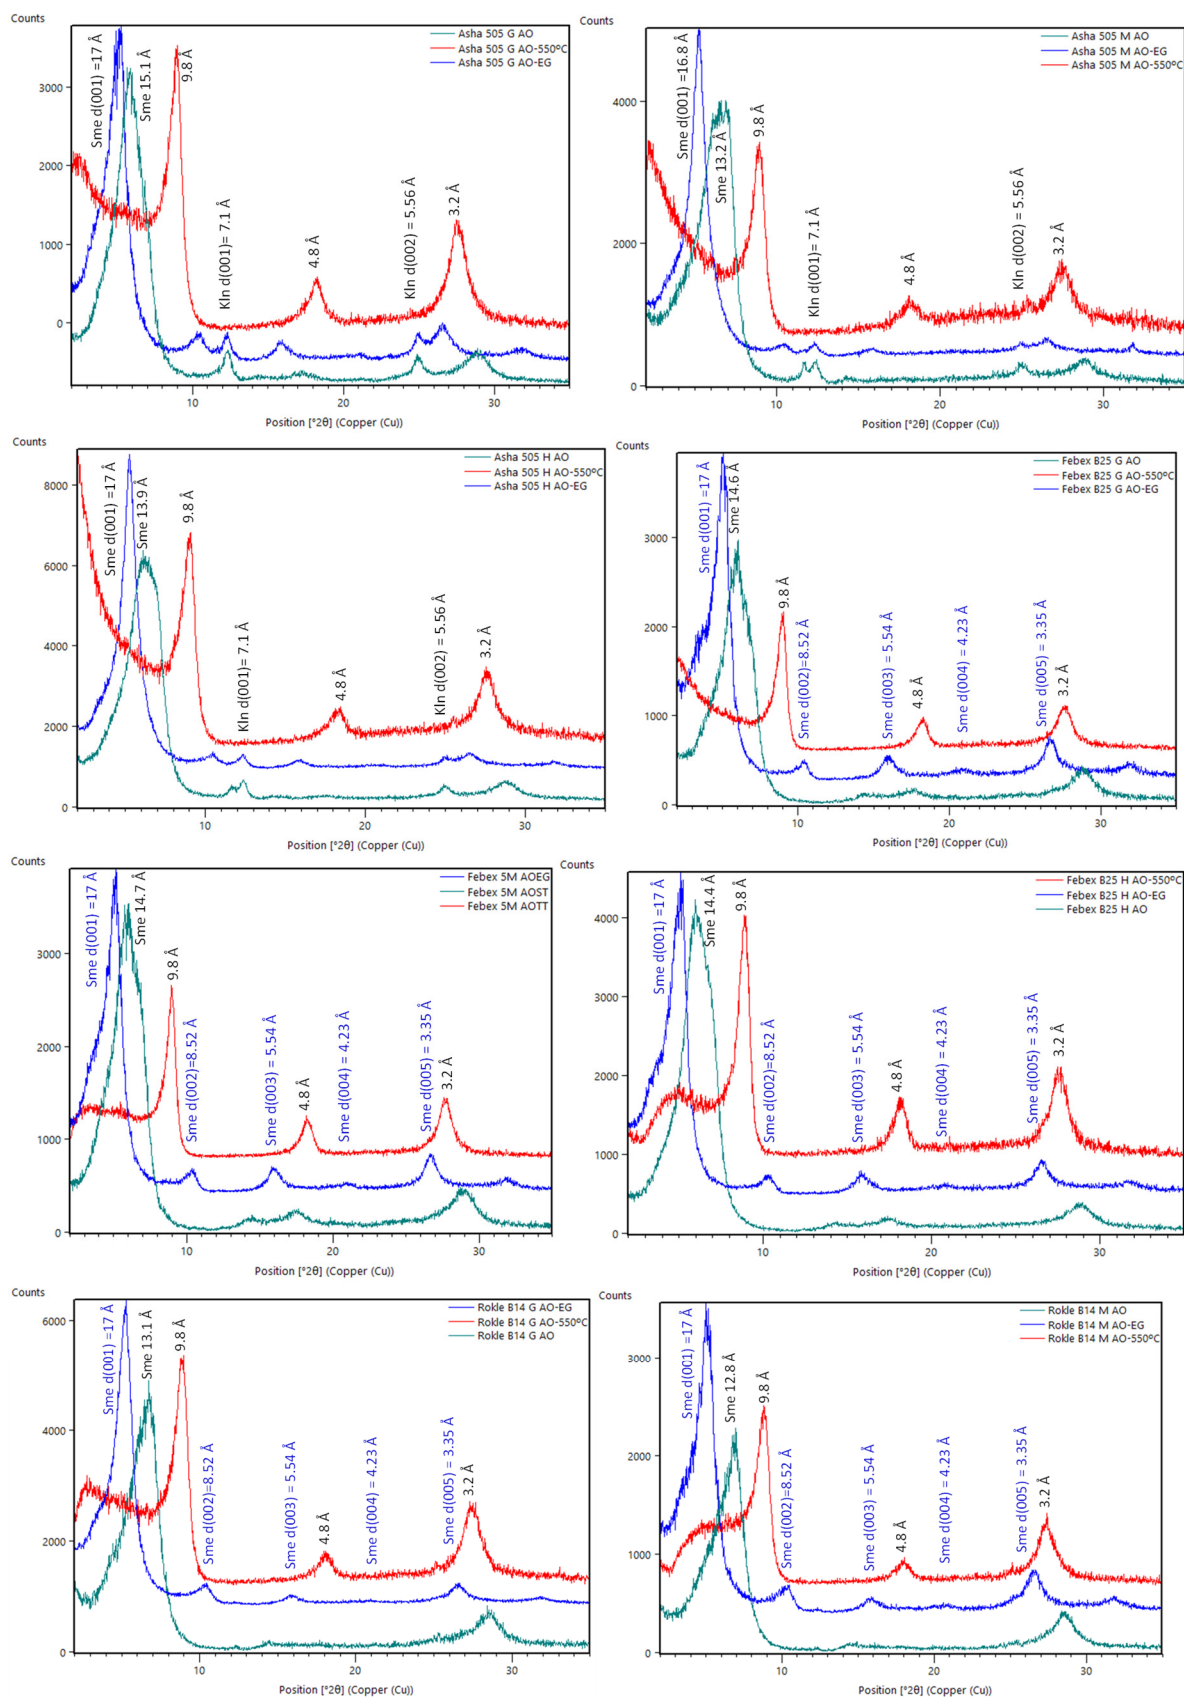

**Figure S2.** XRD patterns of oriented aggregate samples from ABM5 experiment (normal and after ethylene glycol and heating at 550 °C treatments).

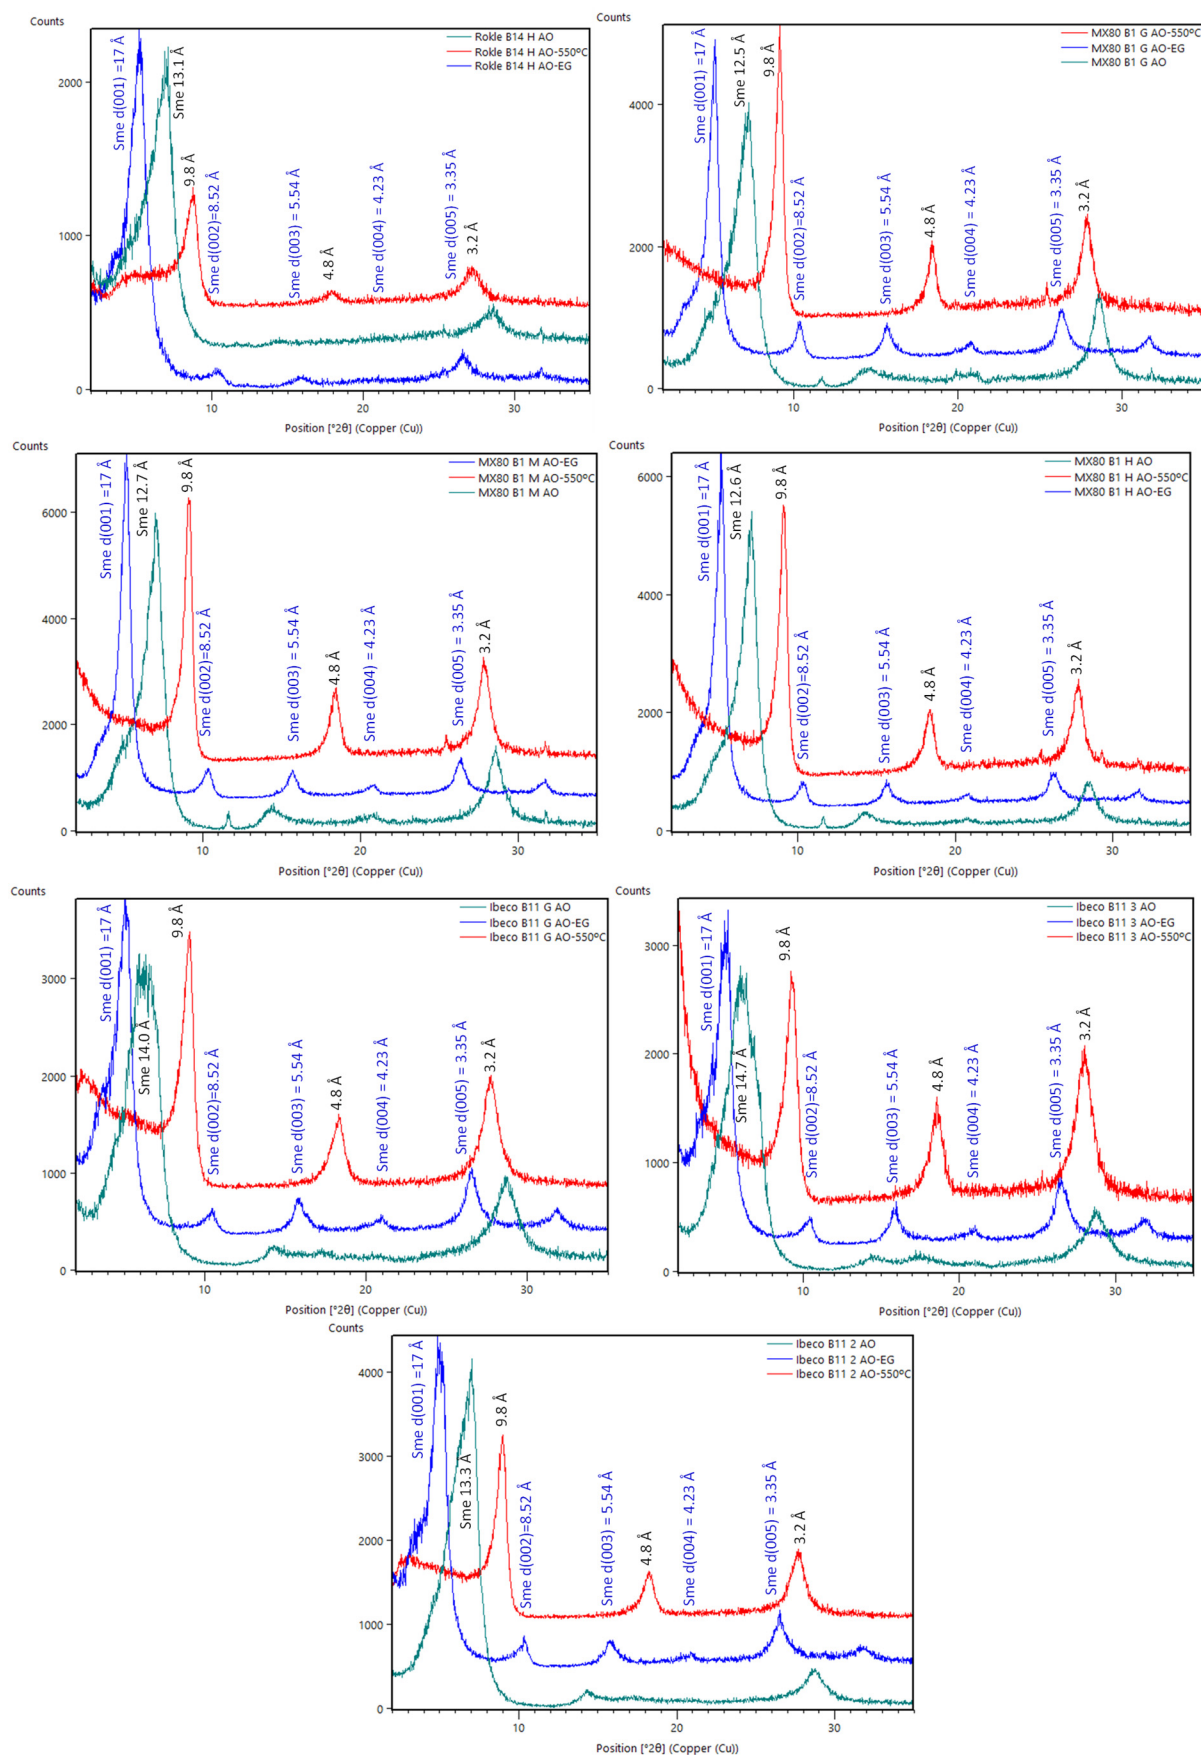

**Figure S2.** XRD patterns of oriented aggregate samples from ABM5 experiment (normal and after ethylene glycol and heating at 550 °C treatments). Continuation.

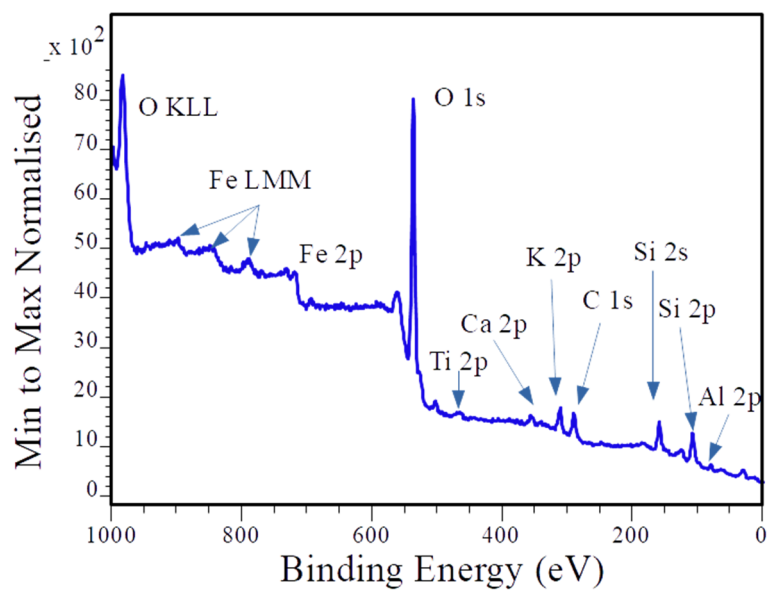

**Figure S3.** Wide scan XPS spectrum recorded from sample Rokle 4H at heater contact.

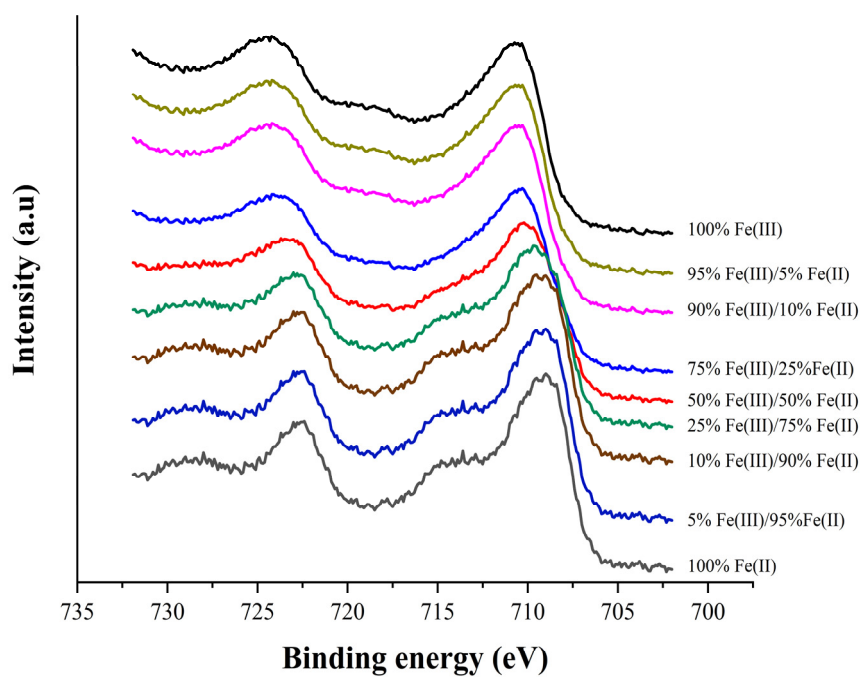

**Figure S4.** Fe 2p XPS spectra recorded from samples containing different concentrations of Fe(III) and Fe(II) standard compounds.

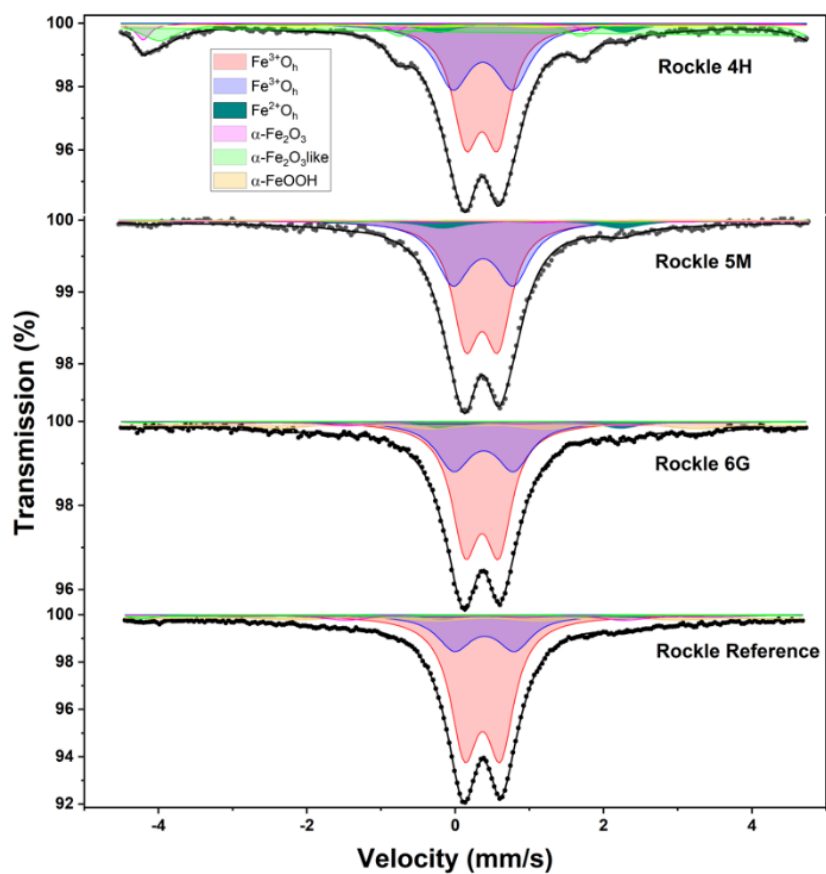

**Figure S5.** Room temperature Mössbauer spectra recorded in a narrow range of velocities for Rokle samples: reference, 4H: close to heater interface, 5M: middle, and 6G: close to granite interface, i.e., at 1.67 cm, 5.00 cm and 8.33 cm from heater contact, respectively.

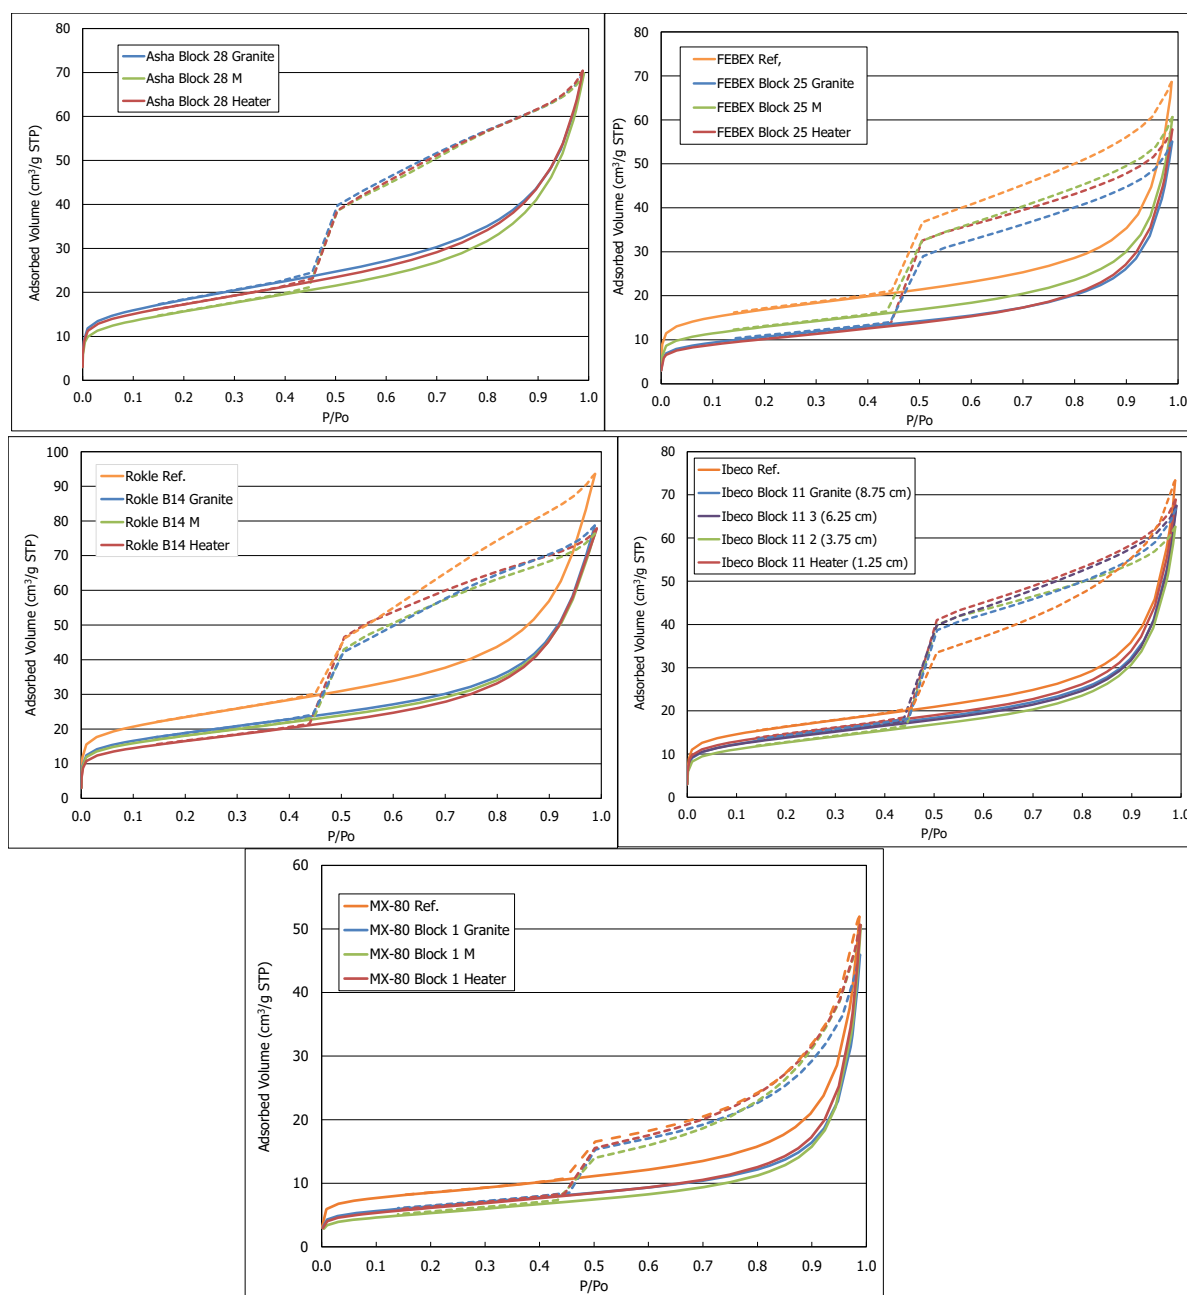

**Figure S6.** N<sub>2</sub> adsorption/desorption isotherms from reference and retrieved ABM5 samples.

## References

1. Madejová, J., Komadel, P. Information available from infrared spectra of the fine fractions of bentonites. In: The application of vibrational spectroscopy to Clay Minerals and Layered Double Hydroxides. CMS workshop lectures (Kloprogge Eds.), 2005, 66-98. The Clay Minerals Society.
2. Madejová, J., Komadel, P. Baseline studies of the Clay Minerals Society Source Clays: Infrared methods. *Clays and Clay Minerals* **2001**, 49, 410-432.
3. Madejová, J. FTIR techniques in clay mineral studies. *Vibrational Spectroscopy* **2003**, 31, 1-10.
4. Farmer, V.C. The infrared spectra of minerals. Mineralogical Society Monograph 4, 1974, 539 pp. Mineralogical Society, London.
5. Svensson, D.; Sandén, T.; Olsson, S.; Dueck, A.; Eriksson, S.; Jägerwall, S.; Hansen, S. Alternative buffer material Status of the ongoing laboratory investigation of reference materials and test package 1. SKB TR-11-06; Svensk Kärnbränslehantering AB: Stockholm, Sweden, 2011, 146 pp.
6. War, L. IMA–CNMNC approved mineral symbols. *Mineralogical Magazine* **2021**, 85, 291–320.
