# Supplementary material
Source: MDPI journal article supplement (https://www.mdpi.com/2075-163X/12/4/471)
Supplement: s1 [file s1]

# Characterization of Bentonites from the *in situ* ABM5 Heater Experiment at Äspö Hard Rock Laboratory, Sweden

Ana María Fernández <sup>1,\*</sup>, José F. Marco <sup>2</sup>, Paula Nieto <sup>1</sup>, Fco. Javier León <sup>1</sup>, Luz María Robredo <sup>1</sup>, María Ángeles Clavero <sup>1</sup>, Ana Isabel Cardona <sup>1</sup>, Sergio Fernández <sup>1</sup>, Daniel Svensson <sup>3</sup> and Patrik Sellin <sup>3</sup>

<sup>1</sup> CIEMAT, Centro de Investigaciones Energéticas, Medioambientales y Tecnológicas, Departamento de Medio Ambiente, 28040 Madrid, Spain; paul.nch@gmail.com (P.N.); fcojavier.leon@ciemat.es (F.J.L.); l.robredo@ciemat.es (L.M.R.); ma.clavero@ciemat.es (M.Á.C.); anaisabel.cardona@ciemat.es (A.I.C.); sergio.fernandez@ciemat.es (S.F.)

<sup>2</sup> CSIC, Consejo Superior de Investigaciones Científicas, Instituto de Química Física “Rocasolano”, 28006 Madrid, Spain; jfmarco@iqfr.csic.es

<sup>3</sup> Department of Research and Safety Assessment, SKB—Svensk Kärnbränslehantering, SE-57229 Oskarshamn, Sweden; daniel.svensson@skb.se (D.S.); patrik.sellin@skb.se (P.S.)

\* Correspondence: anamaria.fernandez@ciemat.es

## Materials

*MX-80 bentonite*, a type of Wyoming bentonite coming from USA. This bentonite is composed by a sodium montmorillonite (~82–84 wt.%) that occurs as layers in marine shales, and is widespread and extensively mined, not only in Wyoming but also in parts of Montana and South Dakota. The bentonite formed through alteration of rhyolitic tephra deposited in ancient Mowry Sea basin during the Cretaceous, more than 65 million years ago [1].

*IBECO Deponit-CA-N* is a Greek bentonite, quarried by S&B Industrial Minerals, S.A. in the north-eastern part of the island of Milos. Pyroclastic tuffs and lavas of andesitic to dacitic composition are the main parent rocks of this bentonite, which forms irregular bodies with a thickness of 10–40 m within the pyroclastics. The bentonite formation is a result of hydrothermal reactions between the permeable volcanic rocks and percolating groundwater heated to below 90°C during volcanic activity, although there is some disagreement about the genesis, e.g. [2]. The major mineral phase (80–84 wt.%) is calcium montmorillonite.

*Rokle bentonite* originates from the Rokle deposit in the Kadan basin within the north Bohemian volcanic areas c. 100 km WNW of Prague (Czech Republic). The deposit is part of a series of argillised volcanoclastic accumulations of Tertiary age, formed by auto-hydrothermal alteration in shallow lacustrine basins within the stratovolcano complex of Doupovské Mountains. The bentonite is capped by basaltic lava-flows. The lens-shaped bentonite body has a maximum thickness of c. 40 m and contains more than 40 million tons of bentonite. The volcanic glass is completely altered to smectite, but mm-sized flakes of biotite, which is a primary constituent of the basaltic magma, are relatively frequent. The bentonite is highly variable in colour, ranging from olive-grey to yellow/red due to the admixture of secondary iron and manganese oxides [3,4]. The major mineral phase (~70 wt.%) is calcium montmorillonite, containing also some kaolinite.

*FEDEX bentonite* was extracted from the Cortijo de Archidona deposit (Serrata de Níjar, Almería, Spain). In this zone, the bentonite deposits are usually associated with fractures, the origin being related to hydrothermal alteration processes that took place in tuffaceous volcanic rocks 15–5 Ma ago (Miocene age). The major mineral phase (90–92 %) is a Ca-Mg-montmorillonite, predominantly calcium [5,6].

*Asha 505* is the commercial name of extensive deposits of natural Na-bentonite quarried in the Kutch area, 60–80 Km from the ports of Kandla and Mandvi on the north-west-coast of India. The bentonite is associated with the basaltic Deccan Trap rocks of Tertiary age and formed through hydrothermal alteration of volcanic ash in saline water [7]. The bentonite occurs in scattered pockets or layers within the basaltic rocks, with thicknesses

ranging between few to 30 meters. The major mineral phase (80-87 wt.%) is sodium montmorillonite, also containing some kaolinite. Because of the high content of secondary iron oxides, the color is normally dark reddish brown.

**Table S1.** Mineral phases observed in the bentonite samples by means of XRD, FTIR and SEM techniques.

| Type of mineral phases | Mineral phases              | Original Samples  | Granite contact       | Medium part           | Heater contact         |
|------------------------|-----------------------------|-------------------|-----------------------|-----------------------|------------------------|
| Fe-oxyhydroxides       | Goethite (weak FM) (Gth)    | Asha 505<br>Rokle | Asha B28<br>Rokle B14 | Asha B28              | Asha B28               |
|                        |                             |                   |                       | Febex B25             | Febex B25              |
|                        |                             |                   |                       | Rokle B14             | Rokle B14              |
|                        |                             |                   |                       | MX-80 B1              | MX-80 B1               |
|                        | Hematite (AFM) (Hem)        | Asha 505<br>MX-80 | Asha B28<br>MX-80 B1  | Asha B28              | Asha B28               |
|                        |                             |                   |                       | MX-80 B1              | Rokle B14<br>MX-80 B1  |
| Carbonates             | Magnetite (FM) (Mag)        | NO                | NO                    | NO                    | NO                     |
|                        | Titanomagnetite (Tmag)      | NO                | NO                    | NO                    | NO                     |
|                        | Maghemite (FM) (Mgh)        | NO                | NO                    | NO                    | NO                     |
|                        | Ferrihydrite (Fhy)          | NO                | NO                    | NO                    | NO                     |
|                        | Calcite (Cal)               | All               | All                   | All                   | All                    |
|                        | Monohydrocalcite (MhCal)    | NO                | NO                    | NO                    | MX-80 B1               |
|                        | Dolomite (Dol)              | Rokle             | Rokle B14             | Rokle B14             | Rokle B14              |
|                        | Magnesite (Mgs)             | NO                | NO                    | NO                    | NO                     |
| Sulfides               | Siderite (Sd)               | Rokle<br>MX-80    | Rokle B14<br>MX-80 B1 | Febex B25             | Febex B25              |
|                        |                             |                   |                       | Rokle B14             | Rokle B14              |
|                        | Pyrite (Py)                 | MX-80             | MX-80 B1              | MX-80 B1              | MX-80 B1               |
|                        |                             |                   |                       | Asha B28              | Asha B28               |
|                        |                             |                   |                       | Rokle B14             | Rokle B14              |
| Sulfates               | Sphalerite (Sp)             | NO                | NO                    | NO                    | MX-80 B1               |
|                        | Gypsum (Gp)                 | MX-80             | MX-80 B1              | Asha B28<br>MX-80 B1  | Asha B28<br>MX-80 B1   |
|                        | Barite (Ba)                 | ?                 | ?                     | ?                     | Febex B25<br>Rokle B14 |
|                        | Quartz (Qz)                 | All               | All                   | All                   | All                    |
| Silica oxides          | Cristobalite (Crs)          | All               | All                   | All                   | All                    |
|                        | Tridymite (Trd)             | ?                 | ?                     | ?                     | Rokle B14              |
| Feldspars              | K-feldspars (KFs)           | All               | All                   | All                   | All                    |
|                        | Plagioclases (Pl)           | All               | All                   | All                   | All                    |
| Titanium oxides        | Anatase (Ant)               | Rokle             | Rokle B14             | Asha B28<br>Rokle B14 | Rokle B14              |
| Mg-hydroxides          | Brucite (Brc)               | No                | No                    | No                    | No                     |
| Zeolites               | Clinoptilolite (Cpt)        | No                | No                    | Asha B28              | Asha B28               |
| Smectites              | Montmorillonite (Mnt)       | All               | All                   | All                   | All                    |
|                        | Saponite (Sap)              | No                | No                    | No                    | No                     |
| Illite/Muscovite       | Illite (Ilt)/Muscovite (Ms) | Febex B25         | Febex B25             | Febex B25             | Febex B25              |
|                        |                             | Rokle             | Rokle B14             | Rokle B14             | Rokle B14              |
|                        |                             | MX-80             | MX-80 B1              | MX-80 B1              | MX-80 B1               |
| Kaolinites             | Kaolinite (Kln)             | Asha 505<br>Rokle | Asha B28<br>Rokle B14 | Asha B28<br>Rokle B14 | Asha B28<br>Rokle B14  |

|           |                                      |    |    |    |    |
|-----------|--------------------------------------|----|----|----|----|
| Chlorites | Clinochlore(Clc)/<br>Chamosite (Chm) | No | No | No | No |
|-----------|--------------------------------------|----|----|----|----|

**Table S2.** Positions and assignments of vibrational bands of dioctahedral smectites, kaolinite and illite.

| Wavenumber (cm <sup>-1</sup> ) | Assignment <sup>[8-11]</sup>                                                                                                                                                                                                                                        |
|--------------------------------|---------------------------------------------------------------------------------------------------------------------------------------------------------------------------------------------------------------------------------------------------------------------|
| 3800-3500                      | OH stretching of inner structural hydroxyl groups (influenced by nature of the coordinated octahedral cations):<br>- AlAlOH (dioctahedral): 3623 cm <sup>-1</sup><br>- Mg <sub>3</sub> OH (trioctahedral): 3680 cm <sup>-1</sup><br>- FeFeOH: 3567 cm <sup>-1</sup> |
| 3426                           | OH stretching of adsorbed water                                                                                                                                                                                                                                     |
| 3240                           | OH stretching of adsorbed water                                                                                                                                                                                                                                     |
| 3150-3170                      | Fe-oxyhydroxide                                                                                                                                                                                                                                                     |
| 1634                           | OH bending of adsorbed water                                                                                                                                                                                                                                        |
| 1430<br>(872, 712)             | $\nu_3$ -CO <sub>3</sub> asymmetric stretching of calcite<br>( $\nu_2$ : out of plane bending, $\nu_4$ : planar bending): calcite                                                                                                                                   |
| 1115                           | Si-O stretching vibration (out-of-plane)                                                                                                                                                                                                                            |
| 1030-1020                      | Si-O stretching vibration (in-plane):<br>- Dioctahedral: 1030 cm <sup>-1</sup><br>- Trioctahedral: 1020 cm <sup>-1</sup>                                                                                                                                            |
| 917                            | Kaolinite inner OH deformation                                                                                                                                                                                                                                      |
| 915                            | AlAlOH bending                                                                                                                                                                                                                                                      |
| 885                            | AlFeOH bending                                                                                                                                                                                                                                                      |
| 850                            | AlMgOH bending                                                                                                                                                                                                                                                      |
| 820                            | FeFeOH bending (nontronite: 817, 676 cm <sup>-1</sup> )                                                                                                                                                                                                             |
| 795                            | MgMgOH bending                                                                                                                                                                                                                                                      |
| 765                            | FeMgOH bending                                                                                                                                                                                                                                                      |
| 792                            | Kaolinite Si-O-Al vibrations                                                                                                                                                                                                                                        |
| 792                            | Si-O stretching of silica                                                                                                                                                                                                                                           |
| 790/800                        | Amorphous silica (opal, volcanic glass, etc.)                                                                                                                                                                                                                       |
| 798 & 780 doublet              | Quartz                                                                                                                                                                                                                                                              |
| 794                            | Cristobalite                                                                                                                                                                                                                                                        |
| 754                            | Kaolinite Si-O-Al vibrations                                                                                                                                                                                                                                        |
| 750                            | Illite Al-O-Si vibration                                                                                                                                                                                                                                            |
| 700                            | Illite OH bending                                                                                                                                                                                                                                                   |
| 698                            | Kaolinite OH translation                                                                                                                                                                                                                                            |
| 655-660                        | Mg <sub>3</sub> OH bending (saponite)                                                                                                                                                                                                                               |
| 644                            | Kaolinite inner surface OH vibration                                                                                                                                                                                                                                |
| 626                            | Coupled Al-O and Si-O (out-of-plane),                                                                                                                                                                                                                               |
| 792, 624                       | Si-O of cristobalite                                                                                                                                                                                                                                                |
| 790                            | Si-O of tridymite                                                                                                                                                                                                                                                   |
| 624                            | R-O-Si with R=Al, Mg, Fe                                                                                                                                                                                                                                            |
| 539                            | Kaolinite Si-O-Al (out of plane) bending (Al in tetrahedral sheet)                                                                                                                                                                                                  |
| 520                            | Si-O-Al bending (Al tetrahedral cation)                                                                                                                                                                                                                             |
| 465                            | Si-O-Si bending vibration                                                                                                                                                                                                                                           |
| 426                            | Si-O bending vibration                                                                                                                                                                                                                                              |
| 825, 750                       | Illite                                                                                                                                                                                                                                                              |
| 740, 790, 890, 1150            | Fe oxyhydroxide                                                                                                                                                                                                                                                     |
| Complex bands 400-900          | Feldspars                                                                                                                                                                                                                                                           |

**Table S3.** Chemical composition of the solid phase (total fraction) for different samples obtained after dismantling of ABM5 experiment: Asha Block 28, Febex Block 25 and Rokle Block 11.

| Samples<br>/ wt. %             | Asha Block 28        |        |        |        | FEBEX Block 25 |        |        |        | Rokle Block 11 |        |        |        |
|--------------------------------|----------------------|--------|--------|--------|----------------|--------|--------|--------|----------------|--------|--------|--------|
|                                | Ref. <sup>[12]</sup> | G      | H      | M      | Ref.           | G      | M      | H      | Ref.           | G      | M      | H      |
| Distance to Heater (cm)        | 10                   | 8.3    | 5.0    | 1.7    | 10             | 8.3    | 5.0    | 1.7    | 10             | 8.3    | 5.0    | 1.7    |
| SiO <sub>2</sub>               | 46.48                | 45.53  | 44.56  | 45.51  | 55.46          | 61.48  | 61.04  | 60.57  | 48.06          | 43.62  | 44.02  | 42.98  |
| Al <sub>2</sub> O <sub>3</sub> | 20.64                | 19.44  | 18.94  | 19.34  | 17.28          | 18.02  | 17.98  | 18.09  | 14.52          | 14.15  | 14.16  | 14.14  |
| Fe <sub>2</sub> O <sub>3</sub> | 12.16                | 23.34  | 24.05  | 21.87  | 3.09           | 6.64   | 6.60   | 8.16   | 15.94          | 24.04  | 23.75  | 24.62  |
| MgO                            | 2.01                 | 2.60   | 2.60   | 2.60   | 4.37           | 4.10   | 4.20   | 4.10   | 2.12           | 2.50   | 2.40   | 2.50   |
| CaO                            | 0.84                 | 3.23   | 3.55   | 3.87   | 1.75           | 4.02   | 3.89   | 3.32   | 2.85           | 3.45   | 3.45   | 3.31   |
| Na <sub>2</sub> O              | 1.97                 | 1.60   | 1.60   | 1.60   | 1.16           | 1.40   | 1.90   | 1.30   | 0.26           | 1.30   | 1.50   | 1.60   |
| K <sub>2</sub> O               | 0.14                 | 0.39   | 0.38   | 0.43   | 0.99           | 1.77   | 1.79   | 1.76   | 1.00           | 1.50   | 1.47   | 1.48   |
| SrO                            | 0.02                 | 0.04   | 0.04   | 0.03   | 0.02           | 0.05   | 0.06   | 0.07   | 0.04           | 0.08   | 0.08   | 0.08   |
| TiO <sub>2</sub>               | 1.01                 | 1.74   | 1.51   | 1.68   | 0.15           | 0.23   | 0.30   | 0.31   | 4.51           | 6.61   | 6.50   | 6.58   |
| P <sub>2</sub> O <sub>5</sub>  | 0.09                 | < d.l. | 0.16   | 0.16   | 0.03           | < d.l. | 0.10   | 0.11   | 0.84           | 0.71   | 0.67   | 0.65   |
| MnO                            | 0.05                 | 0.08   | 0.06   | 0.07   | 0.03           | 0.04   | 0.04   | 0.03   | 0.19           | 0.09   | 0.09   | 0.08   |
| ZnO                            | 0.02                 | 0.05   | 0.04   | 0.05   | 0.01           | 0.02   | 0.02   | 0.02   | 0.02           | 0.03   | 0.03   | 0.03   |
| Cr <sub>2</sub> O <sub>3</sub> | 0.04                 | 0.13   | 0.11   | 0.13   | < d.l.         | 0.02   | 0.02   | < d.l. | 0.03           | 0.00   | 0.08   | 0.09   |
| CuO                            | 0.02                 | 0.04   | 0.03   | 0.03   | < d.l.         | < d.l. | < d.l. | < d.l. | 0.03           | 0.04   | 0.04   | 0.04   |
| NiO                            | 0.01                 | 0.02   | 0.02   | 0.03   | < d.l.         | 0.01   | < d.l. | < d.l. | 0.01           | 0.01   | < d.l. | < d.l. |
| ZrO <sub>2</sub>               | 0.01                 | 0.02   | 0.02   | 0.01   | 0.02           | 0.03   | 0.04   | 0.05   | 0.06           | 0.10   | 0.10   | 0.11   |
| SnO <sub>2</sub>               | < d.l.               | 0.01   | 0.01   | 0.01   | < d.l.         | < d.l. | < d.l. | < d.l. | < d.l.         | < d.l. | < d.l. | 0.01   |
| CdO                            | < d.l.               | < d.l. | 0.01   | 0.01   | < d.l.         | < d.l. | < d.l. | < d.l. | < d.l.         | < d.l. | < d.l. | < d.l. |
| V <sub>2</sub> O <sub>5</sub>  | 0.07                 | 0.04   | < d.l. | < d.l. | 0.01           | < d.l. | < d.l. | 0.01   | < d.l.         | < d.l. | < d.l. | < d.l. |
| PbO                            | < d.l.               | < d.l. | < d.l. | < d.l. | < d.l.         | 0.02   | 0.02   | 0.02   | < d.l.         | < d.l. | < d.l. | < d.l. |
| SO <sub>3</sub>                | 0.15                 | 0.58   | 1.12   | 1.42   | < d.l.         | 0.59   | 0.59   | 0.64   | 0.05           | 0.57   | 0.55   | 0.61   |
| Cl                             | 0.30                 | 1.16   | 1.19   | 1.10   | 0.024          | 1.58   | 1.45   | 1.40   | 0.002          | 1.19   | 1.08   | 1.02   |

**Table S4.** Chemical composition of the solid phase (total fraction) for different samples obtained after dismantling of ABM5 experiment: IBECO Block 11, MX-80 Block 1.

| Samples<br>/ wt. %             | IBECO Block 11 |       |        |        | MX-80 Block 1 |        |       |
|--------------------------------|----------------|-------|--------|--------|---------------|--------|-------|
|                                | Ref.           | G     | 3      | 2      | Ref.          | G      | M     |
| Distance to Heater (cm)        | 10             | 8.75  | 6.25   | 3.75   | 10            | 8.3    | 5.0   |
| SiO <sub>2</sub>               | 50.32          | 60.34 | 60.36  | 60.90  | 62.89         | 60.64  | 60.15 |
| Al <sub>2</sub> O <sub>3</sub> | 15.7           | 17.71 | 18.63  | 18.41  | 19.87         | 20.03  | 20.01 |
| Fe <sub>2</sub> O <sub>3</sub> | 4.76           | 6.52  | 6.71   | 6.94   | 3.53          | 7.60   | 7.50  |
| MgO                            | 4.76           | 5.30  | 4.60   | 4.40   | 2.40          | 2.70   | 2.70  |
| CaO                            | 5.29           | 3.47  | 3.52   | 3.69   | 1.24          | 4.22   | 4.23  |
| Na <sub>2</sub> O              | 0.89           | 2.40  | 2.10   | 1.60   | 2.09          | 1.60   | 1.70  |
| K <sub>2</sub> O               | 0.55           | 1.23  | 1.29   | 1.24   | 0.52          | 0.91   | 0.87  |
| SrO                            | 0.02           | 0.05  | 0.06   | 0.06   | 0.03          | 0.08   | 0.08  |
| TiO <sub>2</sub>               | 0.63           | 0.60  | 0.61   | 0.55   | 0.07          | < d.l. | 0.21  |
| P <sub>2</sub> O <sub>5</sub>  | 0.11           | 0.07  | < d.l. | 0.14   | 0.03          | < d.l. | 0.15  |
| MnO                            | 0.12           | 0.08  | 0.06   | 0.06   | 0.01          | 0.05   | 0.03  |
| ZnO                            | 0.01           | 0.03  | 0.03   | 0.02   | 0.01          | 0.02   | 0.02  |
| ZrO <sub>2</sub>               | 0.02           | 0.03  | 0.04   | 0.04   | 0.03          | 0.04   | 0.04  |
| PbO                            | 0.00           | 0.01  | < d.l. | < d.l. | 0.00          | 0.02   | 0.02  |
| SO <sub>3</sub>                | 0.19           | 0.63  | 0.59   | 0.66   | 0.19          | 1.18   | 1.40  |
| Cl                             | 0.009          | 1.41  | 1.34   | 1.29   | 0.003         | 0.85   | 0.81  |

**Table S5.** Fe(II), Fe(II) and total Fe contents obtained after dismantling of ABM5 experiment.

| Samples     | Distance to heater (cm) | Fe(II) wt. % | Total Fe wt. % | Fe(III) wt. % | Fe(II)/Fe(III) | Fe(II) in Total Fe wt. % |
|-------------|-------------------------|--------------|----------------|---------------|----------------|--------------------------|
| MX-80 Ref.  | --                      | 0.27         | 2.40           | 2.13          | 0.13           | 11.25                    |
| MX-80 B1 G  | 8.3                     | 0.62         | 2.88           | 2.26          | 0.27           | 21.54                    |
| MX-80 B1 M  | 5.0                     | 0.63         | 2.85           | 2.22          | 0.28           | 22.14                    |
| MX-80 B1 H  | 1.7                     | 0.66         | 5.11           | 4.44          | 0.15           | 12.99                    |
| IBECO Ref.  | --                      | 0.19         | 3.10           | 2.91          | 0.07           | 6.13                     |
| IBECO B11 G | 8.75                    | 0.29         | 2.15           | 1.86          | 0.16           | 13.65                    |
| IBECO B11 3 | 6.25                    | 0.30         | 2.19           | 1.89          | 0.16           | 13.57                    |
| IBECO B11 2 | 3.75                    | 0.35         | 2.22           | 1.87          | 0.19           | 15.86                    |
| IBECO B11 H | 1.25                    | 0.60         | 3.36           | 2.76          | 0.22           | 17.81                    |
| Rokle Ref.1 | --                      | 0.37         | 6.97           | 6.60          | 0.06           | 5.28                     |
| Rokle B14 G | 8.3                     | 0.26         | 8.98           | 8.72          | 0.03           | 2.94                     |
| Rokle B14 M | 5.0                     | 0.30         | 8.96           | 8.66          | 0.03           | 3.31                     |
| Rokle B14 H | 1.7                     | 0.36         | 9.59           | 9.22          | 0.04           | 3.81                     |
| Febex Ref.  | --                      | 0.15         | 2.30           | 2.15          | 0.07           | 6.52                     |
| FEBEX 25 G  | 8.3                     | 0.14         | 1.86           | 1.72          | 0.08           | 7.54                     |
| FEBEX B25 M | 5.0                     | 0.16         | 1.90           | 1.74          | 0.09           | 8.37                     |
| FEBEX B25 H | 1.7                     | 0.30         | 2.21           | 1.91          | 0.16           | 13.51                    |
| Asha B28 G  | 8.3                     | 0.19         | 5.74           | 5.55          | 0.03           | 3.32                     |
| Asha B28 M  | 5.0                     | 0.21         | 6.66           | 6.45          | 0.03           | 3.18                     |
| Asha B28 H  | 1.7                     | 0.27         | 5.60           | 5.34          | 0.05           | 4.74                     |

**Table S6.** Parameters deduced from the BET and *t*-plot treatment on the adsorption of N<sub>2</sub> at 77 K from samples obtained after dismantling of ABM5 experiment.

| Sample      | Distance to heater (cm) | C <sub>BET</sub> | V <sub>m</sub> <sup>1</sup> (cm <sup>3</sup> /g) | S <sub>BET</sub> (m <sup>2</sup> /g) | S <sub>tot</sub> <sup>2</sup> (m <sup>2</sup> /g) | V <sub>tot</sub> <sup>3</sup> (cm <sup>3</sup> /g) | S <sub>micro</sub> <sup>4</sup> (m <sup>2</sup> /g) | V <sub>micr</sub> <sup>5</sup> (cm <sup>3</sup> /g) | S <sub>ext micro</sub> <sup>6</sup> (m <sup>2</sup> /g) | S <sub>ext meso</sub> <sup>7</sup> (m <sup>2</sup> /g) | V <sub>meso</sub> <sup>8</sup> (cm <sup>3</sup> /g) |
|-------------|-------------------------|------------------|--------------------------------------------------|--------------------------------------|---------------------------------------------------|----------------------------------------------------|-----------------------------------------------------|-----------------------------------------------------|---------------------------------------------------------|--------------------------------------------------------|-----------------------------------------------------|
| Asha B28 G  | 8.30                    | 209.4            | 2.31·10 <sup>-2</sup> (l)                        | 65.41                                | 66.19                                             | 1.06·10 <sup>-1</sup>                              | 13.54                                               | 5.28·10 <sup>-3</sup>                               | 52.66                                                   | 41.31                                                  | 1.15·10 <sup>-2</sup> (l)                           |
| Asha B28 M  | 5.00                    | 176.0            | 1.98·10 <sup>-2</sup> (l)                        | 55.99                                | 56.18                                             | 1.02·10 <sup>-1</sup>                              | 8.29                                                | 3.29·10 <sup>-3</sup>                               | 47.88                                                   | 39.10                                                  | 7.99·10 <sup>-3</sup> (l)                           |
| Asha B28 H  | 1.70                    | 243.8            | 2.18·10 <sup>-2</sup> (l)                        | 61.49                                | 61.58                                             | 1.08·10 <sup>-1</sup>                              | 13.09                                               | 5.50·10 <sup>-3</sup>                               | 48.49                                                   | 41.53                                                  | 9.39·10 <sup>-3</sup> (l)                           |
| Febex B25 G | 8.30                    | 258.3            | 1.35·10 <sup>-2</sup> (l)                        | 38.01                                | 37.53                                             | 7.80·10 <sup>-2</sup>                              | 8.47                                                | 3.78·10 <sup>-3</sup>                               | 29.06                                                   | 22.98                                                  | 7.03·10 <sup>-3</sup> (l)                           |
| Febex B25 M | 5.00                    | 471.3            | 1.62·10 <sup>-2</sup> (l)                        | 45.76                                | 46.62                                             | 8.90·10 <sup>-2</sup>                              | 13.69                                               | 5.59·10 <sup>-3</sup>                               | 32.93                                                   | 26.02                                                  | 9.28·10 <sup>-3</sup> (l)                           |
| Febex B25 H | 1.70                    | 239.4            | 1.28·10 <sup>-2</sup> (l)                        | 36.20                                | 36.21                                             | 8.41·10 <sup>-2</sup>                              | 7.76                                                | 3.27·10 <sup>-3</sup>                               | 28.44                                                   | 25.36                                                  | 4.99·10 <sup>-3</sup> (l)                           |
| Rokle B14 G | 8.30                    | 341.8            | 2.37·10 <sup>-2</sup> (l)                        | 66.90                                | 67.32                                             | 1.19·10 <sup>-1</sup>                              | 17.53                                               | 7.38·10 <sup>-3</sup>                               | 49.78                                                   | 38.76                                                  | 1.33·10 <sup>-2</sup> (l)                           |
| Rokle B14 M | 5.00                    | 349.8            | 2.27·10 <sup>-2</sup> (l)                        | 64.09                                | 64.77                                             | 1.15·10 <sup>-1</sup>                              | 17.57                                               | 7.27·10 <sup>-3</sup>                               | 47.20                                                   | 38.80                                                  | 1.18·10 <sup>-2</sup> (l)                           |
| Rokle B14 H | 1.70                    | 287.8            | 2.08·10 <sup>-2</sup> (l)                        | 58.70                                | 59.39                                             | 1.16·10 <sup>-1</sup>                              | 14.42                                               | 5.88·10 <sup>-3</sup>                               | 44.94                                                   | 41.01                                                  | 7.94·10 <sup>-3</sup> (l)                           |
| IBECO B11 G | 8.75                    | 319.8            | 1.76·10 <sup>-2</sup> (l)                        | 49.75                                | 51.19                                             | 9.77·10 <sup>-2</sup>                              | 13.90                                               | 5.35·10 <sup>-3</sup>                               | 37.29                                                   | 26.29                                                  | 1.14·10 <sup>-2</sup> (l)                           |
| IBECO B11 3 | 6.25                    | 403.4            | 1.73·10 <sup>-2</sup> (l)                        | 48.98                                | 50.76                                             | 9.58·10 <sup>-2</sup>                              | 16.28                                               | 6.25·10 <sup>-3</sup>                               | 34.49                                                   | 25.75                                                  | 1.11·10 <sup>-2</sup> (l)                           |
| IBECO B11 2 | 3.75                    | 284.7            | 1.59·10 <sup>-2</sup> (l)                        | 45.04                                | 46.21                                             | 9.06·10 <sup>-2</sup>                              | 11.80                                               | 4.54·10 <sup>-3</sup>                               | 34.42                                                   | 25.68                                                  | 9.42·10 <sup>-3</sup> (l)                           |
| IBECO B11 H | 1.25                    | 400.8            | 1.83·10 <sup>-2</sup> (l)                        | 51.71                                | 53.88                                             | 1.00·10 <sup>-1</sup>                              | 16.52                                               | 6.23·10 <sup>-3</sup>                               | 37.36                                                   | 27.55                                                  | 1.15·10 <sup>-2</sup> (l)                           |
| MX 80 B1 G  | 8.30                    | 436.5            | 7.96·10 <sup>-3</sup> (l)                        | 22.48                                | 23.45                                             | 6.32·10 <sup>-2</sup>                              | 6.94                                                | 2.60·10 <sup>-3</sup>                               | 16.52                                                   | 14.45                                                  | 3.73·10 <sup>-3</sup>                               |
| MX 80 B1 M  | 5.00                    | 188.7            | 6.69·10 <sup>-3</sup> (l)                        | 18.91                                | 19.19                                             | 6.04·10 <sup>-3</sup>                              | 3.17                                                | 1.19·10 <sup>-3</sup>                               | 16.02                                                   | 14.91                                                  | 1.78·10 <sup>-3</sup>                               |
| MX 80 B1 H  | 1.70                    | 256.9            | 7.69·10 <sup>-3</sup> (l)                        | 21.72                                | 22.33                                             | 6.82·10 <sup>-2</sup>                              | 4.74                                                | 1.77·10 <sup>-3</sup>                               | 17.60                                                   | 16.05                                                  | 2.61·10 <sup>-3</sup>                               |

<sup>1</sup>V<sub>m</sub>: monolayer capacity derived from the BET treatment; expressed as (l): liquid; S<sub>BET</sub>: BET Surface area.

<sup>2</sup>S<sub>tot</sub>: Total surface area derived from the slope of the straight line passing through the origin of the *t*-plot.

<sup>3</sup>V<sub>tot</sub>: Total pore volume, derived from the amount of nitrogen adsorbed at p/p<sub>0</sub> of 0.98.

<sup>4</sup>S<sub>micro</sub>: S<sub>BET</sub> – S<sub>ext micro</sub>; Surface area of the micropores.

<sup>5</sup>V<sub>micr</sub>: Liquid microporous volume derived from the ordinate at the origin in the second straight line of the *t*-plot.

<sup>6</sup>S<sub>ext micro</sub>: Surface area derived from the slope of the second straight line of the *t*-plot.

<sup>7</sup>S<sub>ext meso</sub>: Surface area derived from the slope of the third straight line of the *t*-plot.

<sup>8</sup>V<sub>meso</sub>: Liquid microporous volume derived from the ordinate at the origin in the third straight line of the *t*-plot.

**Table S7.** Total cation exchange capacity (CEC) and cation exchange population prior and after dismantling of the ABM5 experiment (in meq/100g).

| Sample        | Distance to heater (cm) | Na    | K    | Mg    | Ca    | Sr   | Ba    | Σ CEC | CEC  |
|---------------|-------------------------|-------|------|-------|-------|------|-------|-------|------|
| Asha 505 Ref. | --                      | 62.0  | 0.4  | 12.3  | 19.0  | --   | --    | 93.7  | 88.6 |
| Asha B28 G    | 8.3                     | 15.28 | 1.76 | 7.69  | 33.07 | 0.18 | 0.002 | 58.0  | 85.8 |
| Asha B28 M    | 5.0                     | 17.19 | 1.53 | 6.19  | 42.68 | 0.23 | 0.002 | 67.8  | 83.9 |
| Asha B28 H    | 1.7                     | 26.40 | 2.18 | 7.09  | 48.21 | 0.26 | 0.012 | 84.1  | 81.3 |
| FEDEX Ref.    | --                      | 27.97 | 5.46 | 34.17 | 32.72 | 0.37 | 0.008 | 100.7 | 98.1 |
| Febex B25 G   | 8.3                     | 18.12 | 2.65 | 11.80 | 41.81 | 0.31 | 0.013 | 74.7  | 97.6 |
| Febex B25 M   | 5.0                     | 22.28 | 2.86 | 14.51 | 45.81 | 0.46 | 0.010 | 85.9  | 96.5 |
| Febex B25 H   | 1.7                     | 22.73 | 2.62 | 15.55 | 41.83 | 0.41 | 0.009 | 83.2  | 93.1 |
| Rokle Ref.    | --                      | 0.61  | 4.72 | 19.08 | 52.48 | 0.14 | 0.010 | 77.1  | 73.8 |
| Rokle B14 G   | 8.3                     | 21.82 | 3.01 | 13.15 | 32.89 | 0.15 | 0.012 | 71.0  | 73.1 |
| Rokle B14 M   | 5.0                     | 23.06 | 3.02 | 11.42 | 30.94 | 0.14 | 0.012 | 68.6  | 73.0 |
| Rokle B14 H   | 1.7                     | 22.01 | 3.01 | 12.10 | 29.78 | 0.15 | 0.014 | 67.1  | 70.3 |
| IBECO Ref.    | --                      | 25.19 | 4.31 | 31.37 | 34.67 | 0.20 | 0.019 | 95.8  | 90.2 |
| IBECO B11 G   | 8.75                    | 36.63 | 3.44 | 9.68  | 46.40 | 0.24 | 0.022 | 96.4  | 97.1 |
| IBECO B11 3   | 6.25                    | 37.64 | 3.15 | 9.31  | 46.32 | 0.24 | 0.019 | 96.7  | 97.9 |
| IBECO B11 2   | 3.75                    | 37.43 | 3.97 | 9.97  | 44.17 | 0.26 | 0.073 | 95.9  | 88.6 |
| IBECO B11 H   | 1.25                    | 34.38 | 3.16 | 8.95  | 43.94 | 0.23 | 0.017 | 90.7  | 95.0 |
| MX-80 Ref.    | --                      | 58.49 | 4.18 | 6.86  | 15.63 | 0.44 | 0.009 | 85.6  | 83.6 |
| MX-80 B1 G    | 8.3                     | 23.95 | 1.31 | 8.78  | 48.42 | 0.53 | 0.008 | 83.0  | 84.1 |
| MX-80 B1 M    | 5.0                     | 23.45 | 1.32 | 8.80  | 47.15 | 0.53 | 0.006 | 81.2  | 87.6 |
| MX-80 B1 H    | 1.7                     | 24.52 | 1.40 | 12.65 | 46.31 | 0.55 | 0.007 | 85.4  | 87.8 |

**Table S8.** Soluble salts from aqueous leaching tests a 1:4 solid to liquid ration, in mg/L.

|                               | Asha B28 G | Asha B28 M | Asha B28 H | Febex B25 G | Febex B25 M | Febex B25 H | Rokle B14 G | Rokle B14 M | Rokle B14 H | Ibico B11 G | Ibico B11 3 | Ibico B11 2 | Ibico B11 H | MX 80 B1 G | MX 80 B1 M | MX 80 B1 H |
|-------------------------------|------------|------------|------------|-------------|-------------|-------------|-------------|-------------|-------------|-------------|-------------|-------------|-------------|------------|------------|------------|
| Distance to heater (cm)       | 8.30       | 5.00       | 1.70       | 8.30        | 5.00        | 1.70        | 8.30        | 5.00        | 1.70        | 8.75        | 6.25        | 3.75        | 1.25        | 8.30       | 5.00       | 1.70       |
| w.c. (%)                      | 16.8       | 17.6       | 13.4       | 13.8        | 13.3        | 13.2        | 8.6         | 8.9         | 8.1         | 13.6        | 13.1        | 13.6        | 13.6        | 11.6       | 11.6       | 11.4       |
| Tot. mass (g)                 | 5.02       | 5.00       | 5.01       | 5.00        | 5.00        | 5.01        | 5.00        | 5.00        | 5.01        | 5.04        | 5.00        | 2.50        | 5.01        | 5.00       | 5.01       | 5.00       |
| Tot. water (g)                | 20.72      | 20.75      | 20.59      | 20.61       | 20.59       | 20.58       | 20.40       | 20.41       | 20.38       | 20.60       | 20.58       | 10.30       | 20.60       | 20.52      | 20.52      | 20.51      |
| pH                            | 7.8        | 7.6        | 7.8        | 7.7         | 7.8         | 7.7         | 7.8         | 8           | 7.9         | 7.8         | 7.8         | 7.7         | 7.9         | 7.7        | 7.5        | 7.6        |
| Alk (meq/L)                   | 1.23       | 0.77       | 1.5        | 0.86        | 1.18        | 0.87        | 1.38        | 1.74        | 1.76        | 1.10        | 1.22        | 1.40        | 1.25        | 1.17       | 1.06       | 1.03       |
| F <sup>-</sup>                | 1.1        | 0.52       | 0.15       | 1.1         | 1.2         | 1.3         | 1.6         | 1.7         | 1.7         | 1.1         | 0.94        | 1.1         | 0.8         | 1.2        | 0.86       | 0.98       |
| Br <sup>-</sup>               | 3.1        | 2.9        | 3          | 4.6         | 3.9         | 3.7         | 4.2         | 3.3         | 3           | 4.2         | 3.8         | 4.1         | 3.4         | 1.1        | 0.91       | 0.83       |
| Cl <sup>-</sup>               | 517        | 490        | 521        | 800         | 680         | 645         | 675         | 543         | 495         | 761         | 668         | 670         | 602         | 206        | 176        | 168        |
| NO <sub>3</sub> <sup>-</sup>  | <1.0       | <1.0       | <1.0       | <1.0        | <1.0        | <1.0        | <1          | <1          | <1          | <1          | <1          | <1          | <1          | <1         | <1         | <1         |
| SO <sub>4</sub> <sup>2-</sup> | 155        | 937        | 742        | 147         | 182         | 114         | 151         | 144         | 128         | 103         | 95          | 99          | 100         | 635        | 930        | 939        |
| Si                            | 10         | 13         | 12         | 19          | 17          | 19          | 10          | 13          | 19          | 9.8         | 9.8         | 4.4         | 13          | 1.2        | 14         | 9.3        |
| Na                            | 420        | 650        | 630        | 570         | 510         | 470         | 520         | 450         | 420         | 550         | 500         | 500         | 470         | 440        | 500        | 500        |
| K                             | 5.1        | 9.3        | 9.3        | 11          | 11          | 11          | 18          | 17          | 16          | 14          | 13          | 14          | 13          | 12         | 14         | 15         |

|         |       |       |       |       |       |       |       |       |       |       |       |      |       |      |      |      |
|---------|-------|-------|-------|-------|-------|-------|-------|-------|-------|-------|-------|------|-------|------|------|------|
| Ca      | 13    | 78    | 61    | 23    | 18    | 13    | 15    | 11    | 8.8   | 13    | 10    | 11   | 9     | 29   | 54   | 53   |
| Mg      | 1.4   | 6.5   | 8     | 4.5   | 4     | 3.5   | 4.2   | 3.2   | 2.6   | 1.8   | 1.4   | 1.5  | 1.2   | 3.3  | 5.9  | 5.9  |
| Sr      | 0.13  | 0.67  | 0.56  | 0.32  | 0.34  | 0.25  | 0.17  | 0.14  | 0.11  | 0.16  | 0.13  | 0.14 | 0.11  | 0.71 | 1.4  | 1.5  |
| Ba      | <0.03 | <0.03 | <0.03 | <0.03 | <0.03 | <0.03 | 0.07  | 0.06  | 0.05  | 0.05  | 0.04  | 0.04 | 0.03  | 0.04 | 0.05 | 0.06 |
| B       | 0.66  | 1.1   | 1.4   | 0.53  | 0.8   | 0.31  | 0.09  | 0.05  | <0.03 | 0.19  | <0.22 | <0.3 | <0.16 | <0.3 | <0.3 | <0.3 |
| Fe      | <0.03 | <0.03 | <0.03 | <0.03 | <0.03 | <0.03 | <0.03 | <0.03 | <0.03 | <0.03 | <0.03 | <0.3 | <0.03 | <0.3 | <0.3 | <0.3 |
| Mn      | <0.03 | <0.03 | <0.03 | <0.03 | <0.03 | <0.03 | <0.03 | 0.04  | 0.04  | <0.03 | <0.03 | <0.3 | <0.03 | <0.3 | <0.3 | <0.3 |
| Al      | <0.03 | <0.03 | <0.03 | <0.03 | <0.03 | <0.03 | 0.03  | <0.03 | 0.05  | <0.03 | <0.03 | <0.3 | <0.03 | <0.3 | <0.3 | <0.3 |
| Ti      | <0.03 | <0.03 | <0.03 | <0.03 | <0.03 | <0.03 | <0.03 | <0.03 | <0.03 | <0.03 | <0.03 | <0.3 | <0.03 | <0.3 | <0.3 | <0.3 |
| Zn      | <0.03 | <0.03 | <0.03 | <0.03 | <0.03 | <0.03 | <0.03 | <0.03 | <0.03 | <0.03 | <0.03 | 0.07 | <0.03 | 0.22 | <0.3 | <0.3 |
| Acetate | <1    | <1    | <1    | <1    | <1    | <1    | <1    | <1    | <1    | <1    | <1    | <1   | <1    | <1   | <1   | 3.0  |
| Formate | <1    | <1    | <1    | <1    | <1    | <1    | <1    | <1    | <1    | <1    | <1    | <1   | <1    | <1   | <1   | <1   |

**Table S9.** Ion inventory obtained from aqueous leaching tests, in mol/100g.

| Sample      | Distance to heater<br>(cm) | pH  | Cl <sup>-</sup> | F <sup>-</sup> | Br <sup>-</sup> | SO <sub>4</sub> <sup>2-</sup> | HCO <sub>3</sub> <sup>-</sup> |
|-------------|----------------------------|-----|-----------------|----------------|-----------------|-------------------------------|-------------------------------|
| Asha B28 G  | 8.30                       | 7.8 | 7.0309          | 0.0279         | 0.0187          | 0.7780                        | 0.5928                        |
| Asha B28 M  | 5.00                       | 7.6 | 6.7447          | 0.0134         | 0.0177          | 4.7601                        | 0.3756                        |
| Asha B28 H  | 1.70                       | 7.8 | 6.8495          | 0.0037         | 0.0175          | 3.6003                        | 0.6989                        |
| Febex B25 G | 8.30                       | 7.7 | 10.5830         | 0.0272         | 0.0270          | 0.7177                        | 0.4032                        |
| Febex B25 M | 5.00                       | 7.8 | 8.9476          | 0.0295         | 0.0228          | 0.8839                        | 0.5503                        |
| Febex B25 H | 1.70                       | 7.7 | 8.4615          | 0.0318         | 0.0215          | 0.5520                        | 0.4045                        |
| Rokle B14 G | 8.30                       | 7.8 | 8.4344          | 0.0373         | 0.0233          | 0.6964                        | 0.6111                        |
| Rokle B14 M | 5.00                       | 8.0 | 6.8080          | 0.0398         | 0.0184          | 0.6663                        | 0.7732                        |
| Rokle B14 H | 1.70                       | 7.9 | 6.1383          | 0.0393         | 0.0165          | 0.5858                        | 0.7735                        |
| IBECO B11 G | 8.75                       | 7.8 | 9.9682          | 0.0269         | 0.0244          | 0.4979                        | 0.5112                        |
| IBECO B11 3 | 6.25                       | 7.8 | 8.7709          | 0.0230         | 0.0221          | 0.4604                        | 0.5660                        |
| IBECO B11 2 | 3.75                       | 7.9 | 7.9313          | 0.0197         | 0.0199          | 0.4863                        | 0.6532                        |
| IBECO B11 H | 1.25                       | 7.7 | 8.8444          | 0.0271         | 0.0240          | 0.4823                        | 0.5851                        |
| MX 80 B1 G  | 8.30                       | 7.7 | 2.6612          | 0.0289         | 0.0063          | 3.0276                        | 0.5372                        |
| MX 80 B1 M  | 5.00                       | 7.5 | 2.2692          | 0.0207         | 0.0052          | 4.4255                        | 0.4824                        |
| MX 80 B1 H  | 1.70                       | 7.6 | 2.1656          | 0.0236         | 0.0047          | 4.4672                        | 0.4706                        |

**Table S10.** Calculated parameters and saturation indexes of the pore waters.

| Sample                                | Asha<br>Block 28 S | FEBEX<br>Block 25 W | Rokle<br>Block 14 NW | IBECO<br>Block 11 S | MX-80<br>Block 1 IN |
|---------------------------------------|--------------------|---------------------|----------------------|---------------------|---------------------|
| Sq. Pressure (MPa)                    | 20                 | 30                  | 20                   | 20                  | 30                  |
| a <sub>w</sub>                        | 0.997              | 0.979               | 0.978                | 0.982               | 0.994               |
| Specific Conductance (μS/cm,<br>25°C) | 63461              | 59715               | 60189                | 50531               | 18908               |
| I (M)                                 | 0.91               | 0.85                | 0.82                 | 0.69                | 0.26                |
| Water type                            | Na-Ca-Cl           | Na-Ca-Cl            | Na-Ca-Cl             | Na-Ca-Cl            | Na-Cl               |
| SI Anhydrite                          | 0.24               | 0.14                | 0.15                 | 0.24                | -0.15               |
| SI Gypsum                             | 0.39               | 0.29                | 0.30                 | 0.40                |                     |
| SI Celestine                          | -0.08              | 0.04                | -0.04                | 0.01                | -0.02               |
| SI Barite                             | 1.16               | 1.26                | 1.31                 | --                  | 1.84                |
| SI Calcite                            | 0.98               | 0.41                | 0.79                 | 0.01                | -0.02               |
| SI Dolomite                           | 1.16               | 0.67                | 1.01                 | -0.20               | -0.15               |
| SI Magnesite                          | 0.45               | 0.53                | 0.50                 | 0.06                | 0.14                |
| SI Strontianite                       | -0.73              | -1.08               | -0.79                | -1.62               | -1.28               |

|                        |       |       |       |       |       |
|------------------------|-------|-------|-------|-------|-------|
| SI CO <sub>2</sub> (g) | -3.63 | -2.87 | -3.28 | -2.71 | -2.79 |
| SI Chalcedony          | 1.35  | -0.12 | -0.41 | 1.33  | -0.06 |
| SI Quartz              | 1.64  | 0.17  | -0.13 | 1.62  | 0.22  |
| Greenrust (OH)         | --    | 6.79  | --    | --    | 3.23  |
| Lepidrocrocite         | --    | 5.57  | --    | --    | 4.45  |
| Jarosite (K)           | --    | 3.26  | --    | --    | 0.31  |
| Goethite               | --    | 7.06  | --    | --    | 5.94  |
| Maghemite (dis)        | --    | 12.01 | --    | --    | 9.76  |
| Magnetite              | --    | 13.69 | --    | --    | 10.05 |
| Hematite               | --    | 14.89 | --    | --    | 12.65 |
| Ferrihydrite           | --    | 4.01  | --    | --    | 2.89  |
| SI Halite              | -2.49 | -2.59 | -2.51 | -2.69 | -3.54 |

**Table S11.** Chemical composition of the pore waters obtained by squeezing at 25 MPa for water vapour saturated FEBEX, IBECO RW C16, and MX-80 bentonites at initial conditions.

| Bentonites                           | Febex<br>28.2% w.c. <sup>(*)</sup> | IBECO RW C16<br>28.9% w.c. <sup>(*)</sup> | MX80<br>25.6% w.c. <sup>(*)</sup> |
|--------------------------------------|------------------------------------|-------------------------------------------|-----------------------------------|
| Volume (mL)                          | 5                                  | 1.75                                      | 2                                 |
| pH                                   | 7.3                                | 7.8                                       | 8.0                               |
| E. C. (μS/cm)                        | 21695                              | 13785                                     | 22596                             |
| I (M)                                | 0.27                               | 0.19                                      | 0.33                              |
| Water type                           | Na-Mg-Cl                           | Na-SO <sub>4</sub> -Cl                    | Na-SO <sub>4</sub>                |
| Cl (mg/L)                            | 6600                               | 2800                                      | 1100                              |
| SO <sub>4</sub> <sup>2-</sup> (mg/L) | 2600                               | 4300                                      | 9300                              |
| Br (mg/L)                            | 12                                 | 5                                         | < 5                               |
| NO <sub>3</sub> <sup>-</sup> (mg/L)  | 143                                | 58                                        | 1200                              |
| Alkalinity (meq/L)                   | 2.06                               | 2.88                                      | n.d.                              |
| Si (mg/L)                            | 14                                 | 8.5                                       | < 0.8                             |
| Na (mg/L)                            | 3200                               | 2400                                      | 4900                              |
| K (mg/L)                             | 34                                 | 43                                        | 59                                |
| Ca (mg/L)                            | 649                                | 380                                       | 278                               |
| Mg (mg/L)                            | 591                                | 312                                       | 146                               |
| Sr (mg/L)                            | 11                                 | 4                                         | 6.8                               |
| Fe (mg/L)                            | ≤ 0.15                             | < 0.38                                    | < 0.8                             |
| Al (mg/L)                            | 0.27                               | <0.38                                     | < 0.8                             |
| B (mg/L)                             | 1.2                                | 1.2                                       | < 0.8                             |
| Mn (mg/L)                            | 0.22                               | 0.96                                      | < 0.8                             |
| Ba (mg/L)                            | < 0.15                             | < 0.38                                    | < 0.8                             |
| pCO <sub>2</sub> (bar)               | -2.37                              | -2.70                                     | --                                |

<sup>(\*)</sup>Raw bentonites samples were submitted to a relative humidity of 100% inside a dessicator containing water during at least 3 months prior to squeezing test.



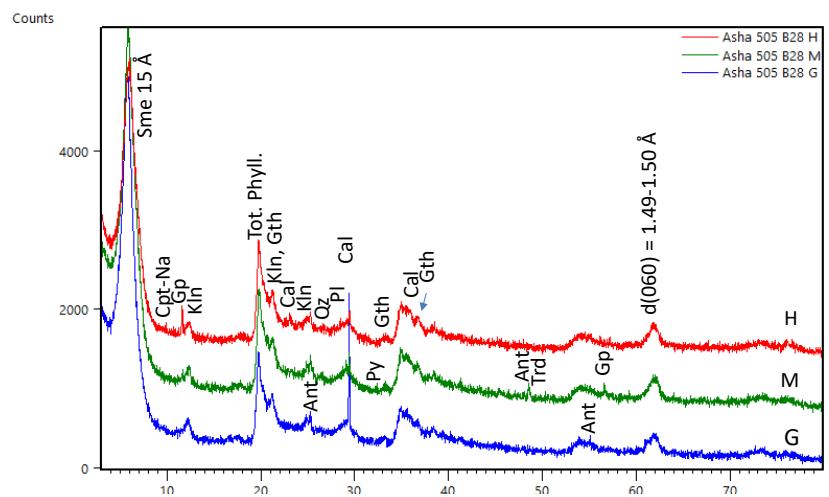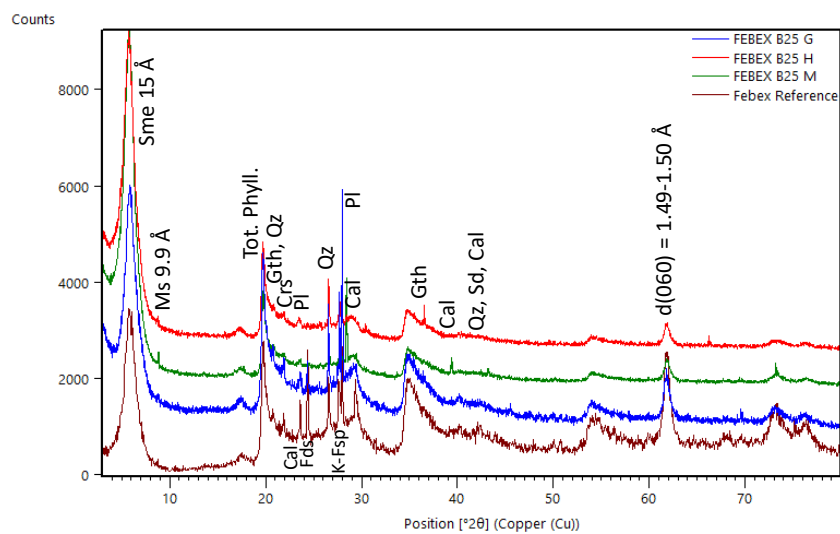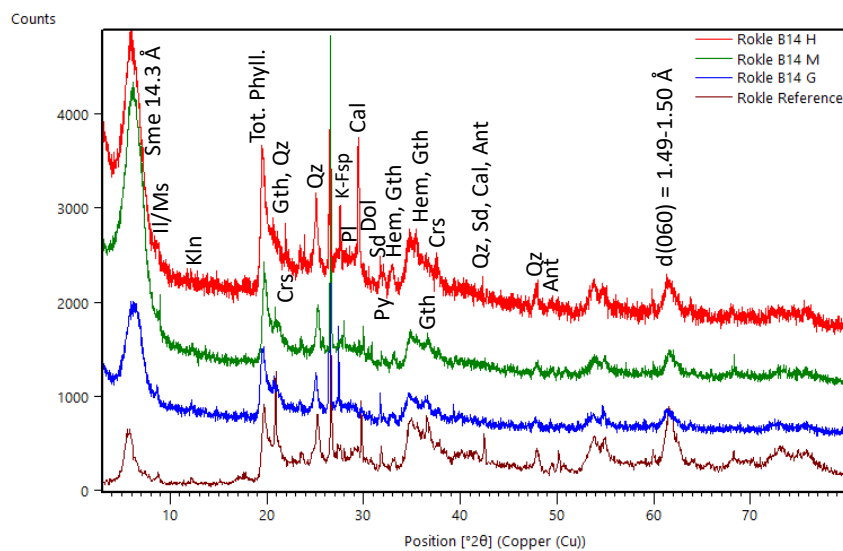

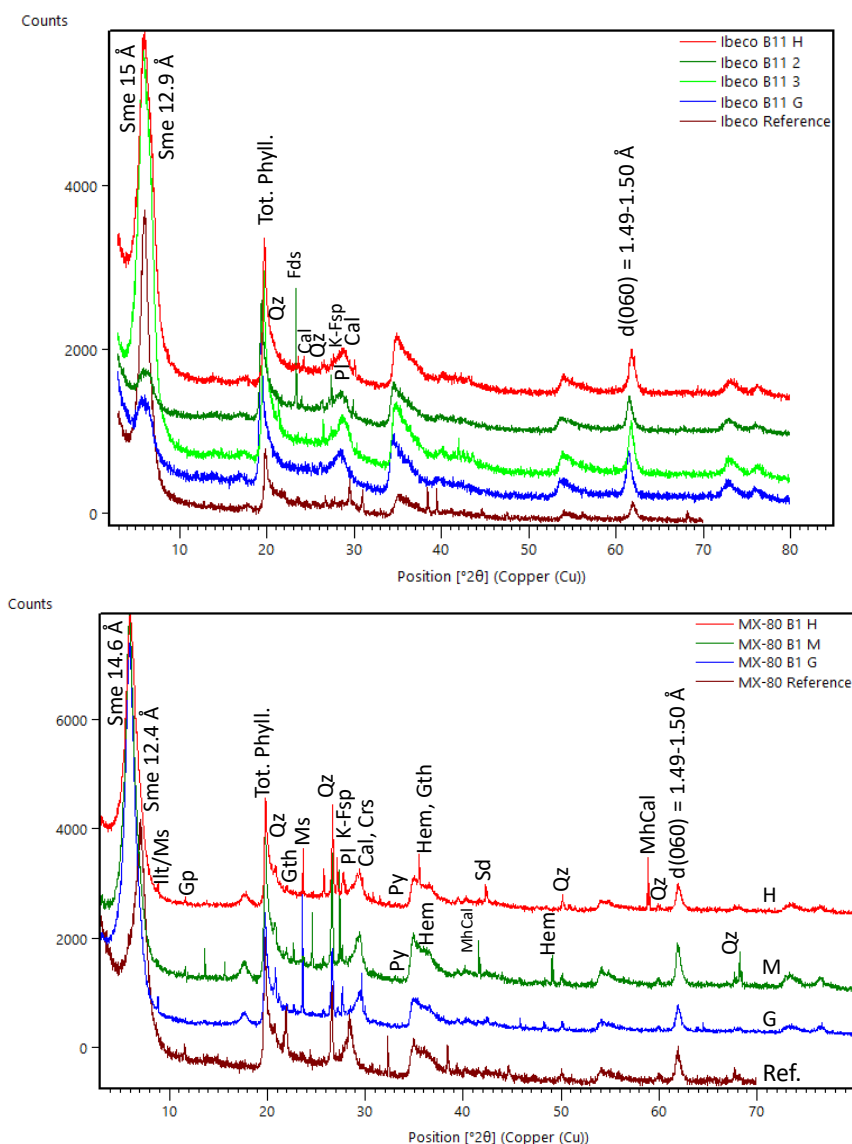

**Figure S1.** XRD patterns of total fraction samples from ABM5 experiment. Continuation. Symbols according to [13]. Sme: smectite, Ilt/Ms: illite/muscovite, Cpt-Na: Clinoptilolite, Gp: Gypsum, Tot. Phyll: total phyllosilicates, Crs: cristobalite, Cal: calcite, MhCla: monohydrocalcite, Qz: quartz, K-Fsp: potassium feldspar, Pl: Plagioclase, Dol: dolomite, Mgs: magnesite, Gth: goethite, Hem: hematite.

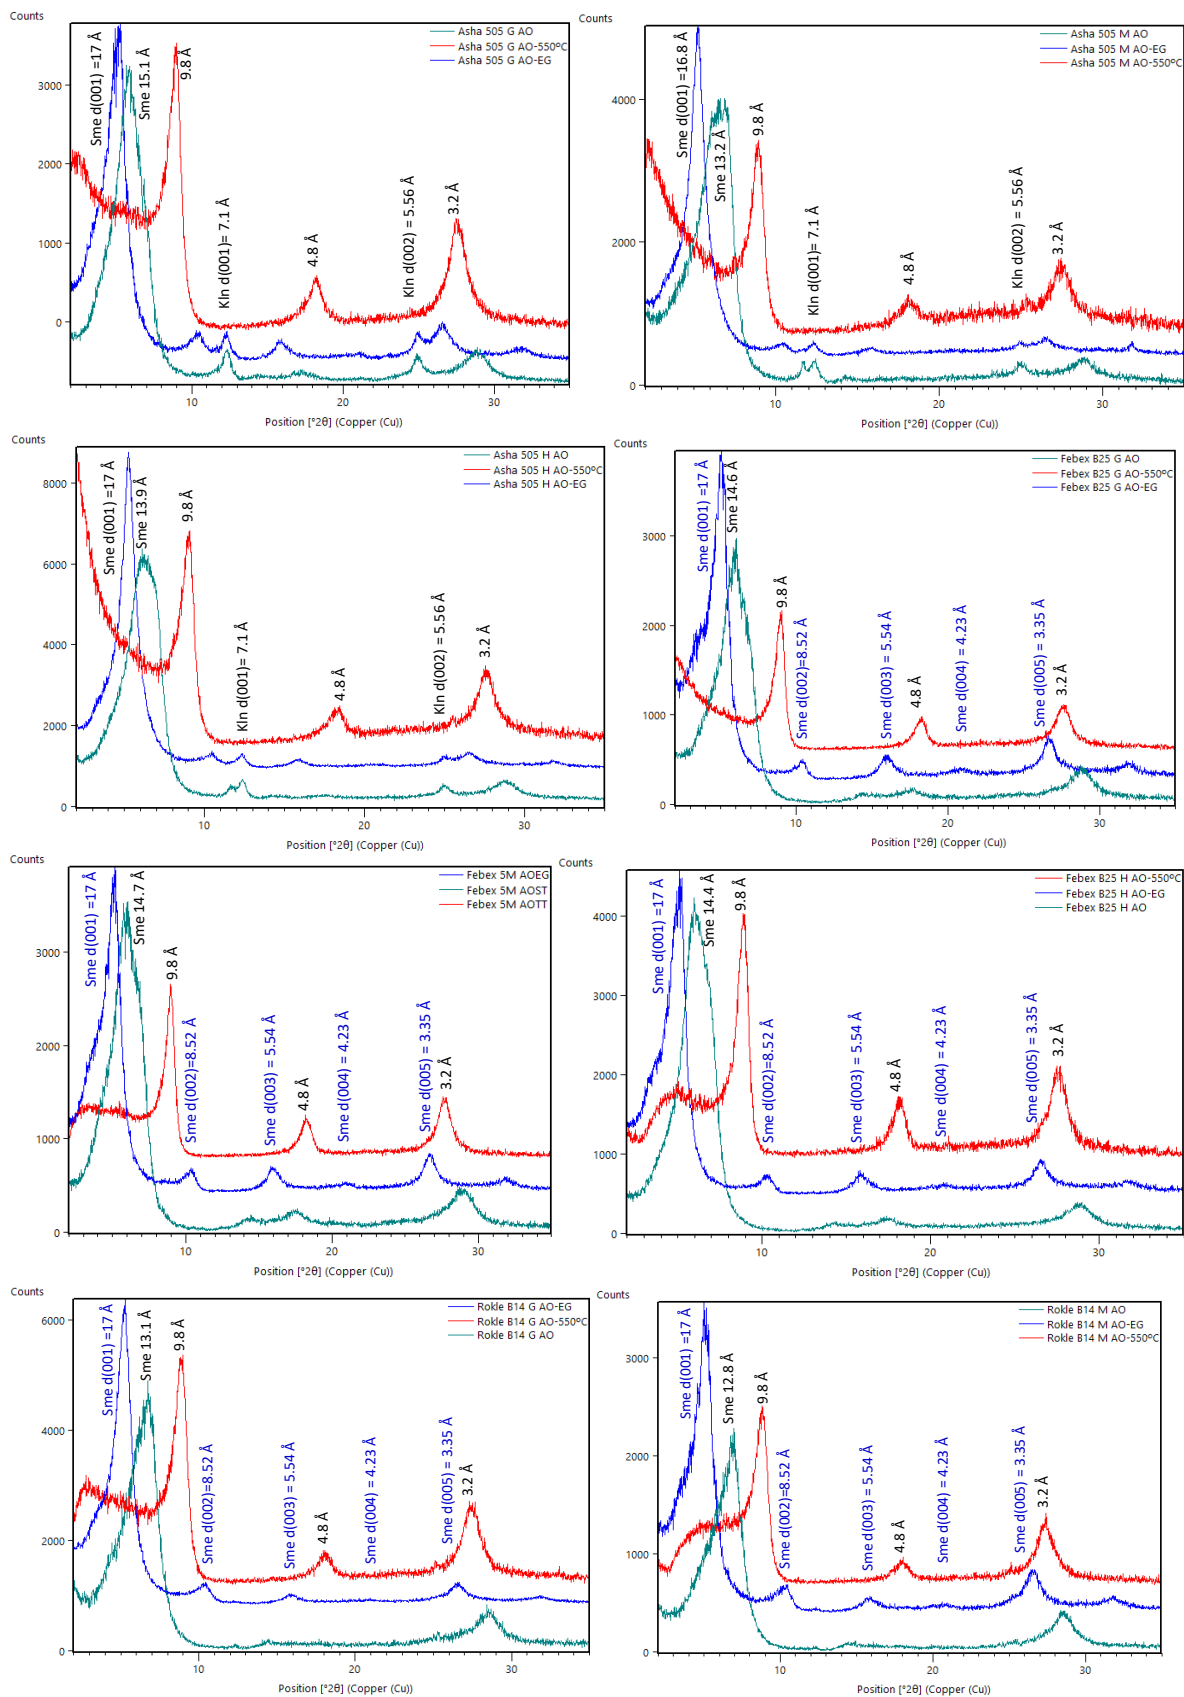

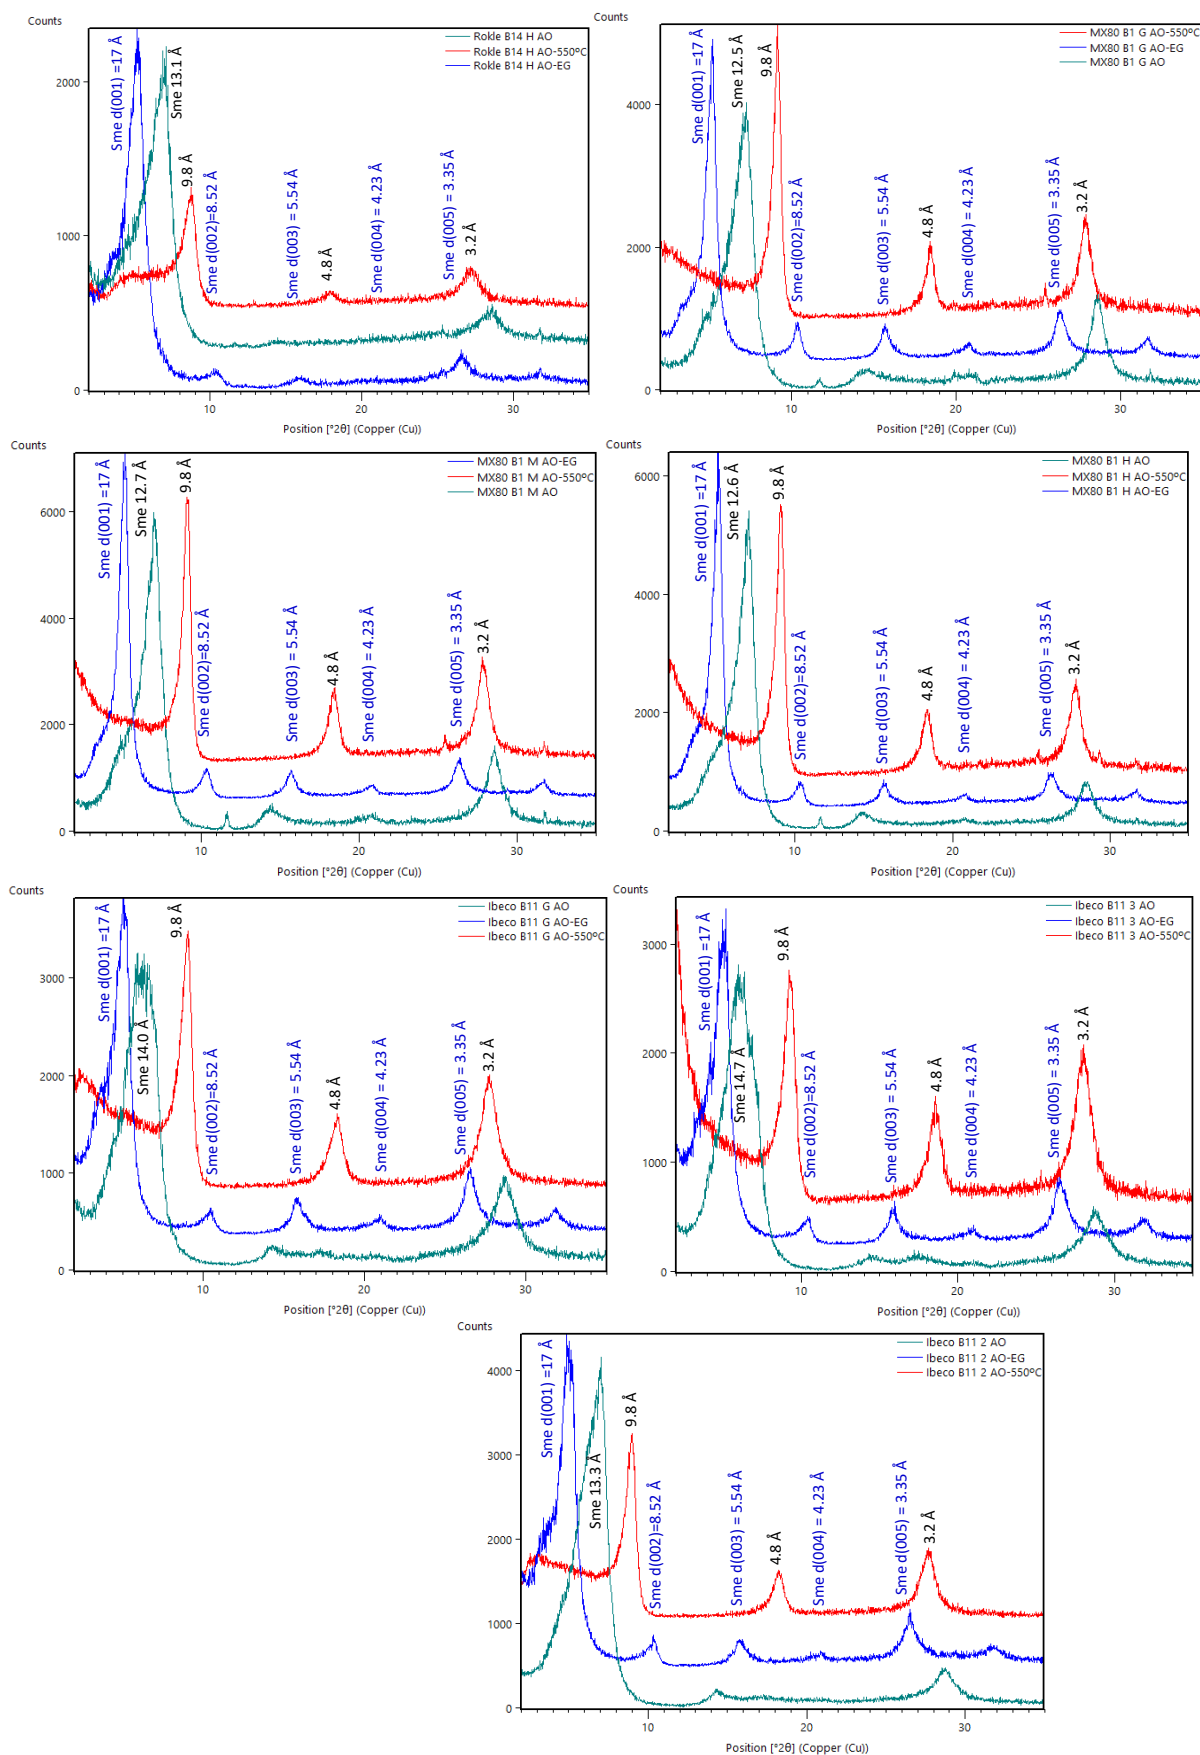

**Figure S2.** XRD patterns of oriented aggregate samples from ABM5 experiment (normal and after ethylene glycol and heating at 550 °C treatments).

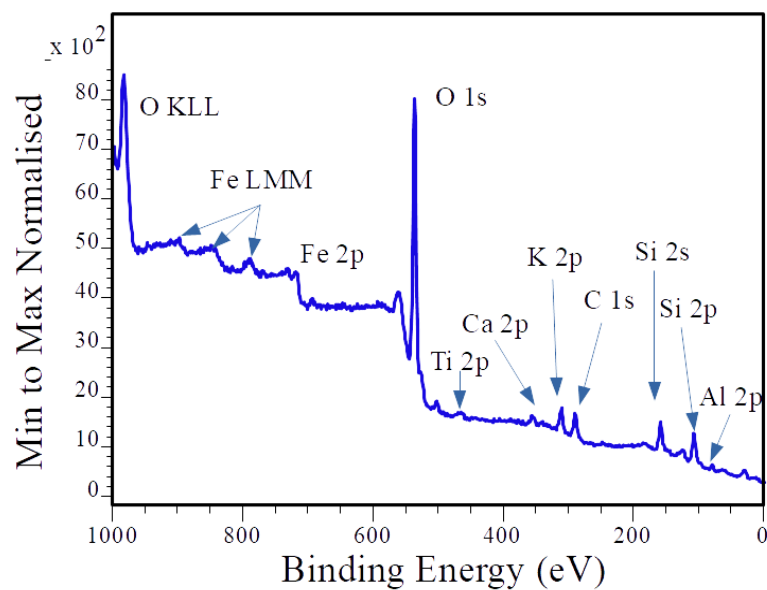

**Figure S3.** Wide scan XPS spectrum recorded from sample Rokle 4H at heater contact.

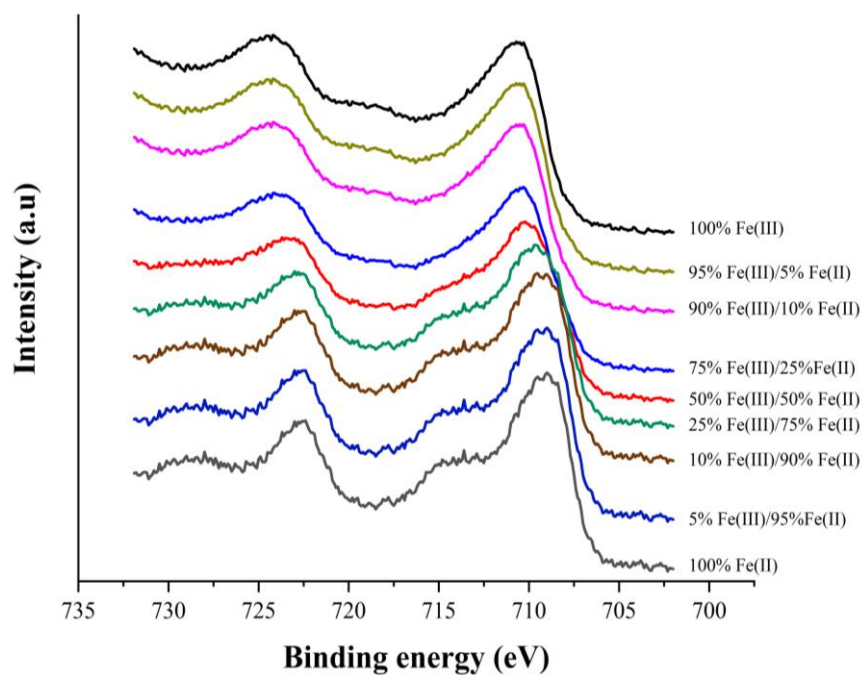

**Figure S4.** Fe 2p XPS spectra recorded from samples containing different concentrations of Fe(III) and Fe(II) standard compounds.

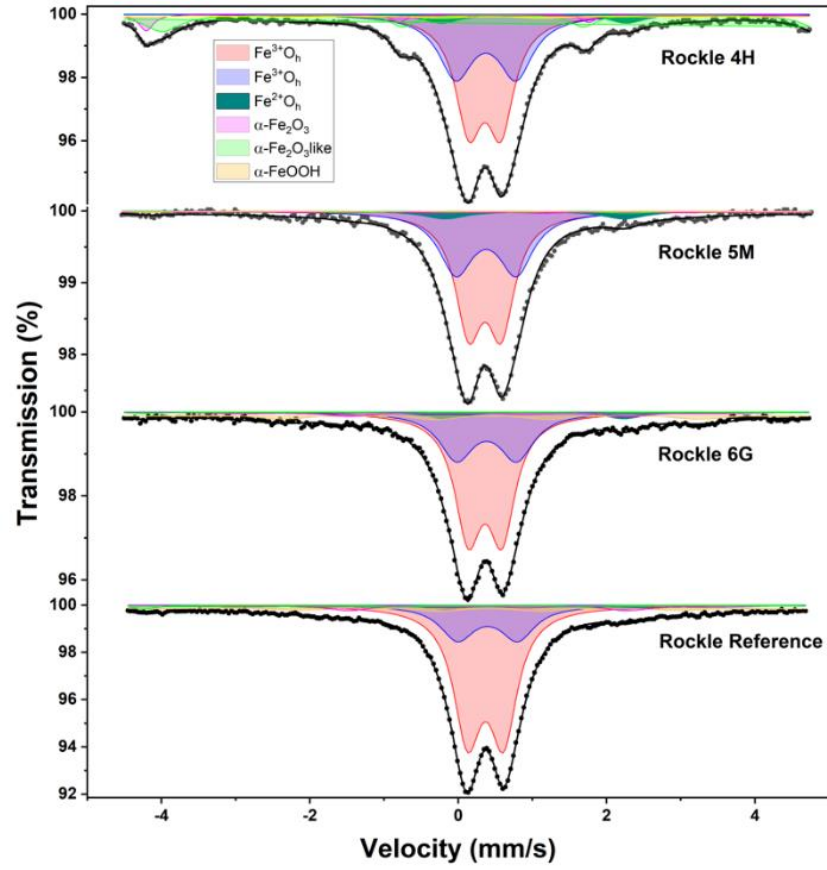

**Figure S5.** Room temperature Mössbauer spectra recorded in a narrow range of velocities for Rokle samples: reference, 4H: close to heater interface, 5M: middle, and 6G: close to granite interface, i.e., at 1.67 cm, 5.00 cm and 8.33 cm from heater contact, respectively.

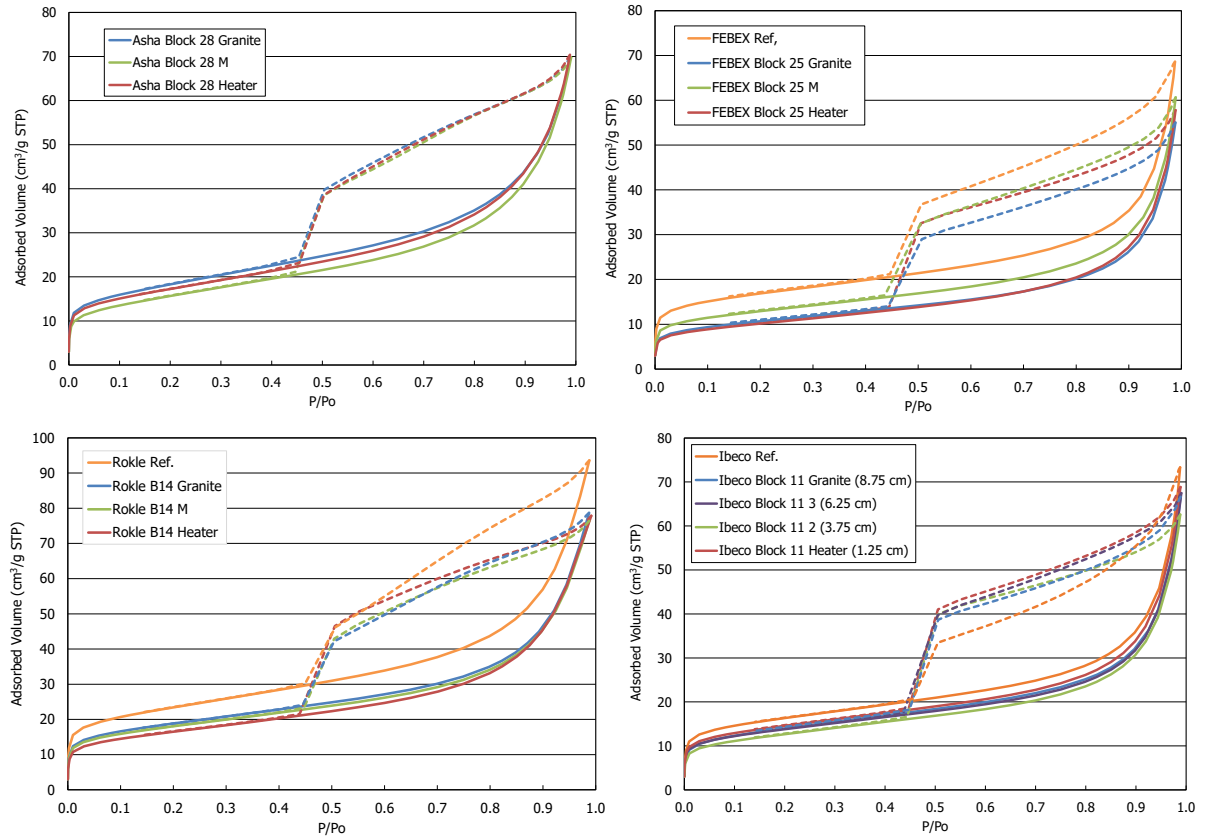

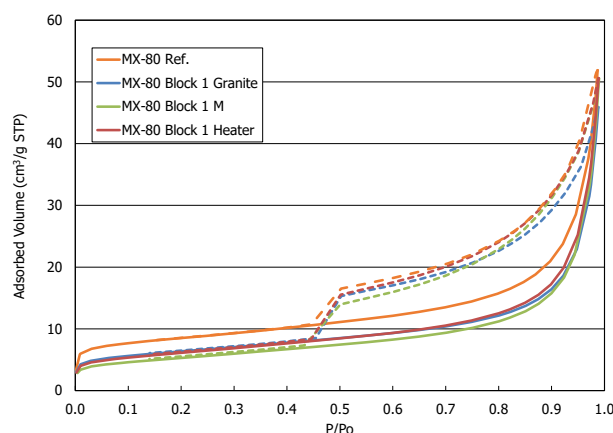

**Figure S6.** N<sub>2</sub> adsorption/desorption isotherms from reference and retrieved ABM5 samples.

## References

1. Slaughter M.; Earley, J. W. Mineralogy and geological significance of the Mowry bentonites, Wyoming. 1965. New York: Geological Society of America. Geological Society of America Special Paper 83.
2. Christidis, G.; Scott, P. W.; Marcopoulos, T. Origin of the bentonite deposits of Eastern Milos, Aegean, Greece: Geological, Mineralogical and Geochemical Evidence. *Clays and Clay Minerals* **1995**, *43*, 63 – 77.
3. Konta, J. Textural variation and composition of bentonite derived from basaltic ash. *Clays and Clay Minerals* **1986**, *34*, 257–265.
4. Přikryl, R.; Woller, F. Going underground: A new market for Czech bentonite in nuclear waste disposal. *Industrial Minerals* **2002**, *415*, 72–77.
5. Huertas, F.; Farina, P.; Farias, J.; Garcia-Sineriz, J.L.; Villar, A.M.; Fernandez, A.M.; Martin, P.L.; Elorza, F.J.; Gens, A.; Sanchez, M.; Lloret, A.; Samper, J.; Martinez, M.A. FEBEX Project. Full-scale Engineered Barriers Experiment for a Deep Geological Repository for High Level Radioactive Waste in Crystalline Host Rock. Updated Final Report 1994-2004. Technical Publication ENRESA 5-0/2006. 2006, pp. 590 (Madrid).
6. Fernandez, A.M.; Baeyens, B.; Bradbury, M.; Rivas, P. Analysis of the pore water chemical composition of a Spanish compacted bentonite used in an engineered barrier. *Physics and Chemistry of the Earth* **2004**, *29*, 105–118.
7. Shah, N. R. Indian bentonite: focus on the Kutch region. *Industrial Minerals* **1997**, *359*, 43–47.
8. Madejová, J., Komadel, P. Information available from infrared spectra of the fine fractions of bentonites. In: The application of vibrational spectroscopy to Clay Minerals and Layered Double Hydroxides. CMS workshop lectures (Kloprogge Eds.), 2005, 66-98. The Clay Minerals Society.
9. Madejová, J., Komadel, P. Baseline studies of the Clay Minerals Society Source Clays: Infrared methods. *Clays and Clay Minerals* **2001**, *49*, 410-432.
10. Madejová, J. FTIR techniques in clay mineral studies. *Vibrational Spectroscopy* **2003**, *31*, 1-10.
11. Farmer, V.C. The infrared spectra of minerals. Mineralogical Society Monograph 4, 1974, 539 pp. Mineralogical Society, London.
12. Svensson, D.; Sandén, T.; Olsson, S.; Dueck, A.; Eriksson, S.; Jägerwall, S.; Hansen, S. Alternative buffer material Status of the ongoing laboratory investigation of reference materials and test package 1. SKB TR-11-06; Svensk Kärnbränslehantering AB: Stockholm, Sweden, 2011, 146 pp.
13. War, L. IMA–CNMNC approved mineral symbols. *Mineralogical Magazine* **2021**, *85*, 291–320.
