# Supplementary material
Source: MDPI journal article supplement (https://www.mdpi.com/2075-163X/12/4/471)
Supplement: s1 [file s1]

Archive with 3 entries (3 files):
- minerals-1639341-supplementary.pdf
- Submission/ABM experiment final.pdf
- Submission/Supplementary Material final.pdf
